# Supplementary material for: Neurymenolide A, a Novel Mitotic Spindle Poison from the New Caledonian Rhodophyta Phacelocarpus neurymenioides
Source: MDPI journal article supplement (doi:10.3390/md17020093), 2019-02-01
Supplement: s1 [file s1]

## SUPPLEMENTARY MATERIALS

# **Neurymenolide A, a novel mitotic spindle poison from the New Caledonian Rhodophyta *Phacelocarpus neurymenioides*.**

**Sofia-Eléna Motuhi <sup>1,2,3</sup>, Omid Feizbakhsh <sup>2,4</sup>, Béatrice Foll-Josselin <sup>2</sup>, Blandine Baratte <sup>2</sup>, Claire Delehouzé <sup>2</sup>, Arnaud Cousseau <sup>2,3</sup>, Xavier Fant <sup>2</sup>, Jeannette Chloë Bulinski <sup>2,5</sup>, Claude Elisabeth Payri <sup>1</sup>, Sandrine Ruchaud <sup>2</sup>, Mohamed Mehiri <sup>3,\*</sup> and Stéphane Bach <sup>2,\*</sup>**

<sup>1</sup> UMR ENTROPIE (IRD—Université de La Réunion—CNRS), Laboratoire d'Excellence Labex-CORAIL, Institut de Recherche pour le Développement (IRD), BP A5, Nouméa Cedex 98848, Nouvelle-Calédonie; sofia-elena.motuhi@sb-roscoff.fr (S.-E.M.); claude.payri@ird.fr (C.E.P.)

<sup>2</sup> Sorbonne Université, CNRS, USR 3151, Protein Phosphorylation & Human Diseases, Station Biologique de Roscoff, CS 90074, 29688 Roscoff Cedex, France; beatrice.josselin@sb-roscoff.fr (B.F.-J.); baratte@sb-roscoff.fr (B.B.); claire.delehouze@gmail.com (C.D.); xavierfant@yahoo.fr (X.F.); sandrine.ruchaud@sb-roscoff.fr (S.R.)

<sup>3</sup> UMR 7272 CNRS, Marine Natural Products Team, Nice Institute of Chemistry (ICN), University Nice Sophia Antipolis, Parc Valrose, Nice Cedex 02 F-06108, France; arnaud.cousseau@unice.fr (A.C.)

<sup>4</sup> Sorbonne Université, CNRS, UMR 8227, Integrative Biology of Marine Models, Station Biologique de Roscoff, CS 90074, 29688 Roscoff Cedex, France; omid.feizbakhsh@sb-roscoff.fr (O.F.)

<sup>5</sup> Department of Biological Sciences, Columbia University, New York, NY, 10027, USA; jcb4@columbia.edu (J.C.B.)

\* Correspondence: mohamed.mehiri@univ-cotedazur.fr (M.M.); bach@sb-roscoff.fr (S.B.); Tel.: +33-492-076-154 (M.M.); Tel.: +33-298-292-391 (S.B.); Fax: +33-492-076-151 (M.M.); Fax: +33-298-292-526 (S.B.)

## **1. Videos**

**Video S1:** Time-lapse imaging in living human osteosarcoma cells treated with control (DMSO) (cf. AVI video file).

**Video S2:** Time-lapse imaging in living human osteosarcoma cells treated with neurymenolide A (cf. AVI video file).

## 2. Figure

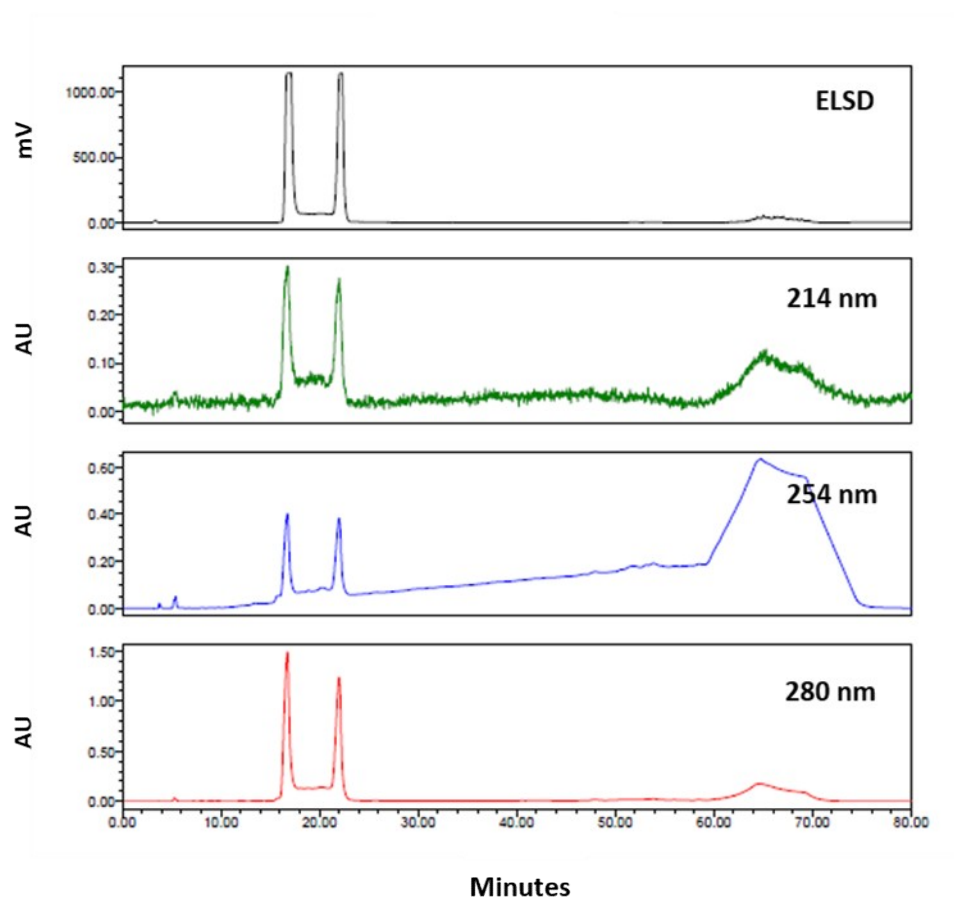

**Figure S1.** HPLC-UV-ELSD chromatogram of two equimolar mixtures of neurymenolide A. Interchrom Lichrospher Diol column, 250 × 4.6 mm id, 5  $\mu$ m, gradient C<sub>4</sub>H<sub>8</sub>O<sub>2</sub>/C<sub>6</sub>H<sub>14</sub> 20:80 from 0 to 5 minutes and then from 20:80 to 100:0 in 55 minutes.

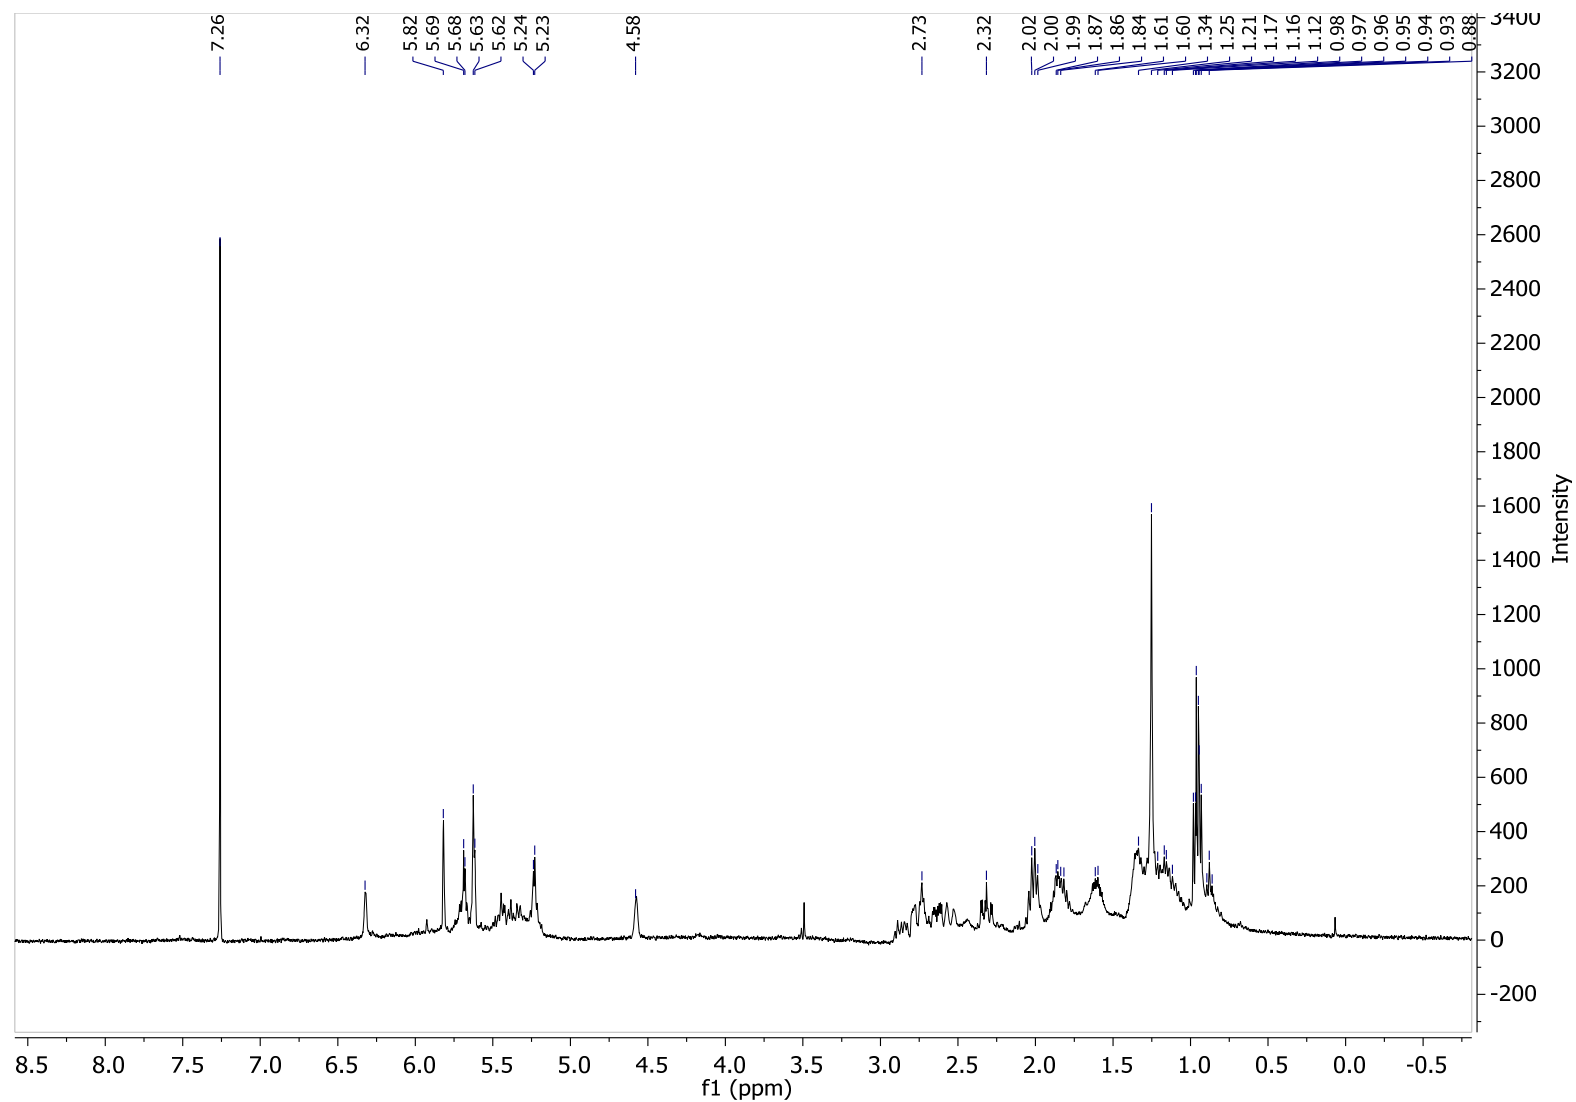

**Figure S2.** <sup>1</sup>H NMR spectrum of nearymenolide A in CDCl<sub>3</sub> at 400 MHz.

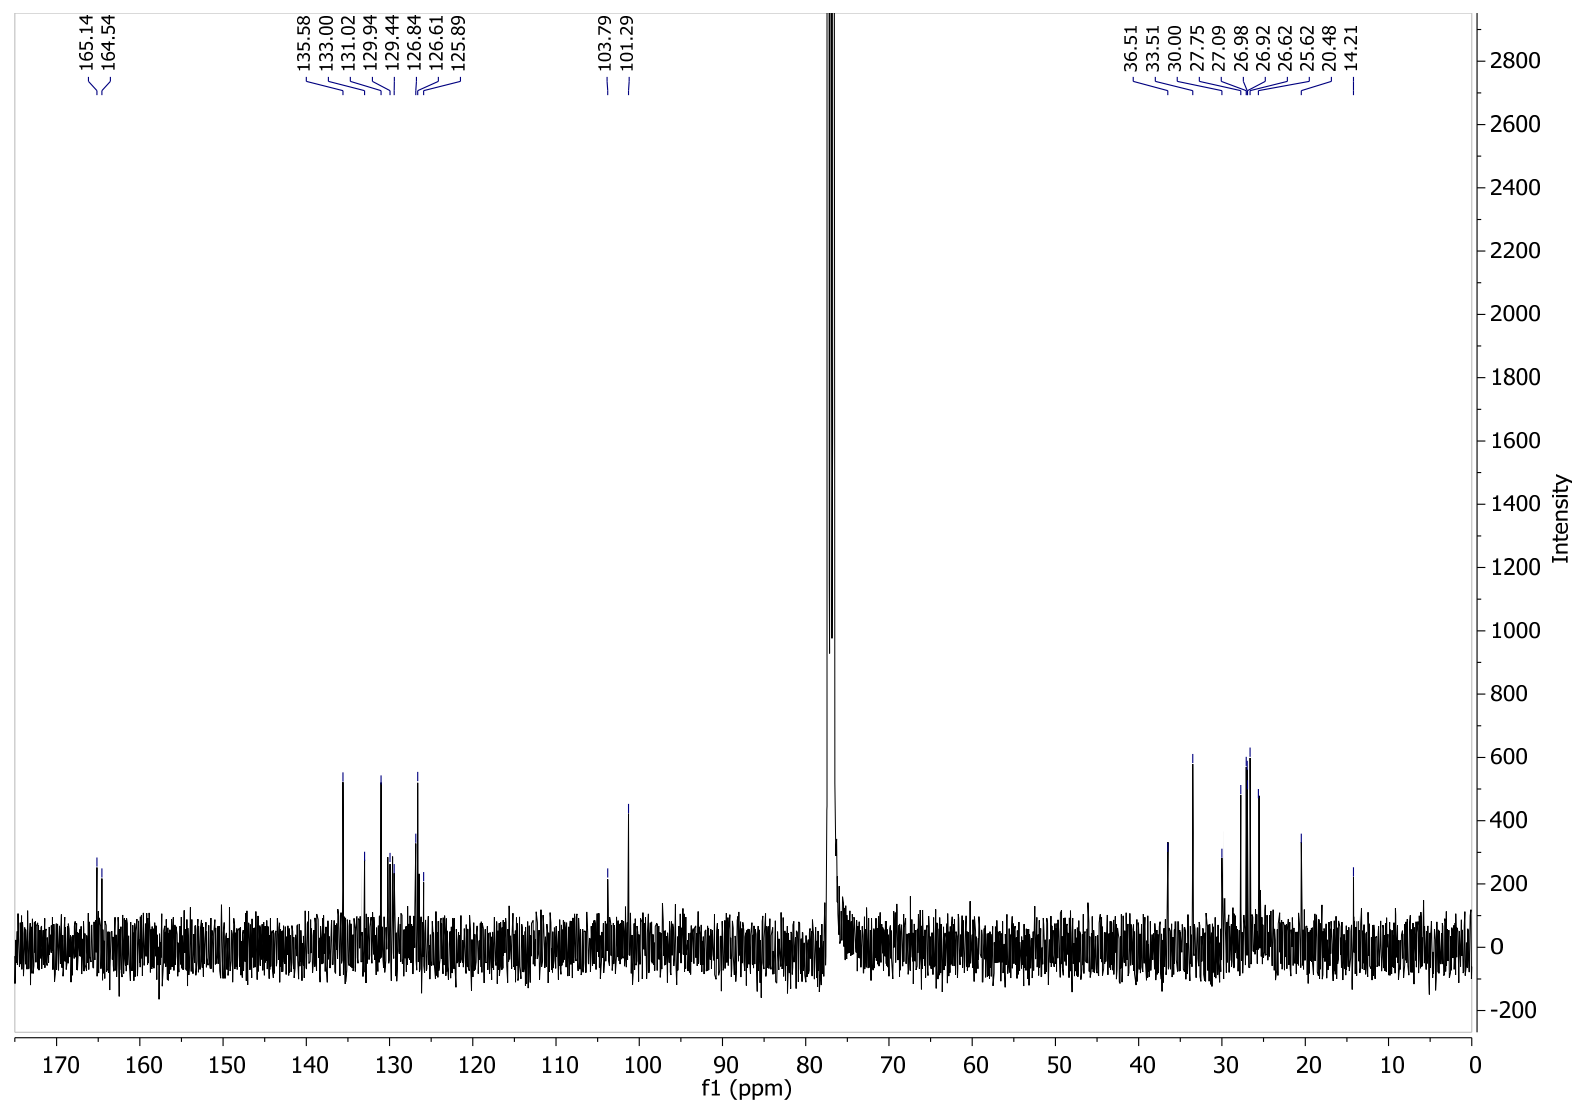

**Figure S3.** <sup>13</sup>C NMR spectrum of neurymenolide A in CDCl<sub>3</sub> at 100 MHz.

### 3. Tables

**Table S1.**  $E_{\text{total}}$ , Boltzmann factor,  $\Delta E$  and % for atropisomers of neurymenolide A.

| Structure                  | $E_{\text{total}}$ | $\Delta E$ | Boltzmann factor | $\Delta E$ (Kcal/mol) | %           |
|----------------------------|--------------------|------------|------------------|-----------------------|-------------|
| ( <i>P</i> , <i>S</i> )-C1 | -1159.5253         | 0.00106297 | 0.32440          | 0.667023888           | 14.02962482 |
| ( <i>P</i> , <i>S</i> )-C2 | -1159.5262         | 0.00021484 | 0.79650          | 0.134814164           | 34.44696724 |
| ( <i>P</i> , <i>S</i> )-C3 | -1159.5240         | 0.00236237 | 0.08192          | 1.482409873           | 3.542869499 |
| ( <i>P</i> , <i>S</i> )-C4 | -1159.5241         | 0.00233208 | 0.08459          | 1.463402607           | 3.658341442 |
| ( <i>P</i> , <i>S</i> )-C5 | -1159.5264         | 0          | 1                | 0                     | 43.24791869 |
| ( <i>P</i> , <i>S</i> )-C6 | -1159.5229         | 0.00348901 | 0.02484          | 2.189387298           | 1.074278300 |
| ( <i>M</i> , <i>S</i> )-C1 | -1159.5265         | 0          | 1                | 0                     | 48.50130954 |
| ( <i>M</i> , <i>S</i> )-C2 | -1159.5246         | 0.00194551 | 0.12740          | 1.220826218           | 6.179066835 |
| ( <i>M</i> , <i>S</i> )-C3 | -1159.5248         | 0.00174408 | 0.15770          | 1.094426957           | 7.648656514 |
| ( <i>M</i> , <i>S</i> )-C4 | -1159.5252         | 0.00133272 | 0.24380          | 0.836294605           | 11.82461926 |
| ( <i>M</i> , <i>S</i> )-C5 | -1159.5251         | 0.00137908 | 0.23210          | 0.865385950           | 11.25715394 |
| ( <i>M</i> , <i>S</i> )-C6 | -1159.5254         | 0.00113423 | 0.30080          | 0.711740223           | 14.58919391 |
| ( <i>M</i> , <i>R</i> )-C1 | -1159.5253         | 0.00114690 | 0.29680          | 0.719690770           | 13.35348954 |
| ( <i>M</i> , <i>R</i> )-C2 | -1159.5262         | 0.00031367 | 0.71730          | 0.196830939           | 32.27243278 |
| ( <i>M</i> , <i>R</i> )-C3 | -1159.5240         | 0.00245775 | 0.07405          | 1.542261739           | 3.331623655 |
| ( <i>M</i> , <i>R</i> )-C4 | -1159.5240         | 0.00245448 | 0.07430          | 1.540209783           | 3.342871540 |
| ( <i>M</i> , <i>R</i> )-C5 | -1159.5265         | 0          | 1                | 0                     | 44.99154159 |
| ( <i>M</i> , <i>R</i> )-C6 | -1159.5238         | 0.00265340 | 0.06019          | 1.665033994           | 2.708040888 |
| ( <i>P</i> , <i>R</i> )-C1 | -1159.5265         | 0          | 1                | 0                     | 49.47311136 |
| ( <i>P</i> , <i>R</i> )-C2 | -1159.5245         | 0.00201770 | 0.11800          | 1.266126136           | 5.837827141 |
| ( <i>P</i> , <i>R</i> )-C3 | -1159.5247         | 0.00184228 | 0.14210          | 1.156048401           | 7.030129125 |
| ( <i>P</i> , <i>R</i> )-C4 | -1159.5252         | 0.00133449 | 0.24330          | 0.837405297           | 12.03680799 |
| ( <i>P</i> , <i>R</i> )-C5 | -1159.5251         | 0.00140245 | 0.22640          | 0.880050850           | 11.20071241 |
| ( <i>P</i> , <i>R</i> )-C6 | -1159.5254         | 0.00116402 | 0.29150          | 0.730433734           | 14.42141196 |

**Table S2.** Coordinates (Ångstroms) for conformer (*P*, *S*)-C1 of neurymenolide A (Energy: -1159.525325 Hartree, Solvent: CH<sub>3</sub>OH, Boltzmann %: 14.02962482).

| Atom | X        | Y        | Z        |
|------|----------|----------|----------|
| O    | -1.72766 | -1.54851 | -0.98034 |
| C    | -2.39691 | -2.23864 | -0.02307 |
| C    | -1.94315 | -2.23774 | 1.25275  |
| C    | -0.77682 | -1.47704 | 1.57471  |
| C    | -0.10764 | -0.71481 | 0.6285   |
| C    | -0.59812 | -0.75247 | -0.72239 |
| O    | -0.15785 | -0.16149 | -1.70493 |
| C    | 1.1232   | 0.10313  | 1.03646  |
| C    | 0.7953   | 1.3656   | 1.85208  |
| C    | 0.0464   | 2.43429  | 1.54     |
| O    | -0.42743 | -1.56274 | 2.87499  |
| C    | -0.72289 | 2.74276  | 0.27864  |
| C    | -2.09436 | 3.31649  | 0.5714   |
| C    | -3.23643 | 3.09939  | -0.0999  |
| C    | -3.44222 | 2.22568  | -1.31014 |
| C    | -4.63354 | 1.25159  | -1.19242 |
| C    | -4.54694 | 0.29762  | 0.01389  |
| C    | -5.34016 | -1.01196 | -0.17093 |
| C    | -4.70961 | -2.0303  | -1.14325 |
| C    | -3.61599 | -2.94263 | -0.5328  |
| C    | 2.11797  | 0.43159  | -0.06305 |
| C    | 3.36348  | -0.05922 | -0.09107 |
| C    | 4.41212  | 0.29927  | -1.11989 |
| C    | 5.5955   | 1.00759  | -0.49705 |
| C    | 6.87751  | 0.60855  | -0.46819 |
| C    | 7.4795   | -0.64774 | -1.04207 |
| C    | 8.22354  | -1.47976 | 0.01826  |
| H    | -2.4596  | -2.78964 | 2.03278  |
| H    | 1.68667  | -0.54566 | 1.7262   |
| H    | 1.3049   | 1.39857  | 2.8175   |
| H    | 0.00459  | 3.22685  | 2.29235  |
| H    | 0.43366  | -1.15101 | 3.09267  |
| H    | -0.77468 | 1.87986  | -0.38659 |
| H    | -0.14682 | 3.50955  | -0.27014 |
| H    | -2.12834 | 4.00788  | 1.41746  |
| H    | -4.13025 | 3.62349  | 0.25091  |
| H    | -2.53496 | 1.6521   | -1.5295  |
| H    | -3.61433 | 2.87101  | -2.18564 |
| H    | -4.68119 | 0.67423  | -2.12495 |
| H    | -5.57354 | 1.81888  | -1.13794 |
| H    | -4.91463 | 0.81476  | 0.90913  |
| H    | -3.49626 | 0.06965  | 0.22256  |
| H    | -6.34678 | -0.76001 | -0.53267 |
| H    | -5.48385 | -1.49571 | 0.80547  |

**Table S2.** *Cont.*

| Atom | X        | Y        | Z        |
|------|----------|----------|----------|
| H    | -4.30232 | -1.51708 | -2.02257 |
| H    | -5.49117 | -2.70179 | -1.51886 |
| H    | -4.03798 | -3.51871 | 0.2982   |
| H    | -3.29815 | -3.66317 | -1.29938 |
| H    | 1.79897  | 1.1391   | -0.82471 |
| H    | 3.67869  | -0.76319 | 0.68469  |
| H    | 3.95838  | 0.95367  | -1.87755 |
| H    | 4.73958  | -0.60911 | -1.64076 |
| H    | 5.34888  | 1.95462  | -0.01068 |
| H    | 7.59208  | 1.26469  | 0.03753  |
| H    | 8.19534  | -0.36787 | -1.82972 |
| H    | 6.71542  | -1.26689 | -1.52435 |
| H    | 7.53682  | -1.82884 | 0.79767  |
| H    | 9.00782  | -0.88803 | 0.50499  |
| H    | 8.69806  | -2.35747 | -0.43454 |

**Table S3.** Coordinates (Ångstroms) for conformer (*P*, *S*)-C2 of neurymenolide A (Energy: -1159.526173 Hartree, Solvent: CH<sub>3</sub>OH, Boltzmann %: 34.44696724).

| Atom | X        | Y        | Z        |
|------|----------|----------|----------|
| O    | -1.83664 | -1.42437 | -1.13109 |
| C    | -2.72289 | -2.0741  | -0.34057 |
| C    | -2.46053 | -2.24247 | 0.97921  |
| C    | -1.26084 | -1.68573 | 1.51978  |
| C    | -0.3626  | -0.96966 | 0.74169  |
| C    | -0.64807 | -0.83099 | -0.65552 |
| O    | 0.00767  | -0.25001 | -1.51725 |
| C    | 0.90083  | -0.40879 | 1.40425  |
| C    | 0.63232  | 0.78932  | 2.32933  |
| C    | 0.12805  | 2.00013  | 2.0478   |
| O    | -0.98093 | -1.83725 | 2.82844  |
| C    | -0.34505 | 2.56085  | 0.72703  |
| C    | -1.65228 | 3.31438  | 0.86275  |
| C    | -2.69403 | 3.32025  | 0.0158   |
| C    | -2.82849 | 2.57555  | -1.28743 |
| C    | -4.15558 | 1.8029   | -1.44239 |
| C    | -4.41174 | 0.76755  | -0.33141 |
| C    | -5.37786 | -0.36241 | -0.74151 |
| C    | -4.79769 | -1.40797 | -1.71632 |
| C    | -3.95075 | -2.53097 | -1.06548 |
| C    | 2.07257  | -0.11343 | 0.48698  |
| C    | 3.23062  | -0.78335 | 0.53966  |
| C    | 4.44169  | -0.48393 | -0.30658 |
| C    | 5.69694  | -0.22476 | 0.50649  |
| C    | 6.92045  | -0.03902 | -0.0124  |
| C    | 7.25571  | -0.06127 | -1.48764 |
| C    | 8.73361  | 0.22757  | -1.7789  |
| H    | -3.16609 | -2.76601 | 1.62102  |
| H    | 1.23998  | -1.21028 | 2.07183  |
| H    | 0.94378  | 0.61837  | 3.36098  |
| H    | 0.06757  | 2.70648  | 2.88062  |
| H    | -1.66854 | -2.37402 | 3.29351  |
| H    | -0.39781 | 1.78979  | -0.043   |
| H    | 0.42201  | 3.27814  | 0.3841   |
| H    | -1.7228  | 3.94334  | 1.75418  |
| H    | -3.54797 | 3.95141  | 0.27891  |
| H    | -1.99347 | 1.87922  | -1.42047 |
| H    | -2.75759 | 3.2992   | -2.11446 |
| H    | -4.13653 | 1.30629  | -2.42104 |
| H    | -4.99569 | 2.51102  | -1.47726 |
| H    | -4.81708 | 1.27911  | 0.5506   |
| H    | -3.45662 | 0.3426   | -0.00645 |
| H    | -6.26477 | 0.09148  | -1.20527 |
| H    | -5.74059 | -0.88003 | 0.15762  |



**Table S3.** *Cont.*

| Atom | X        | Y        | Z        |
|------|----------|----------|----------|
| H    | -4.20504 | -0.91608 | -2.49675 |
| H    | -5.62277 | -1.9118  | -2.23419 |
| H    | -4.56663 | -3.09528 | -0.35648 |
| H    | -3.64081 | -3.23073 | -1.85422 |
| H    | 1.96624  | 0.71839  | -0.2057  |
| H    | 3.33227  | -1.6171  | 1.24153  |
| H    | 4.23074  | 0.37539  | -0.96026 |
| H    | 4.62779  | -1.33211 | -0.98566 |
| H    | 5.57756  | -0.18315 | 1.59094  |
| H    | 7.74917  | 0.14545  | 0.67547  |
| H    | 6.62861  | 0.66929  | -2.01989 |
| H    | 6.98421  | -1.03967 | -1.91237 |
| H    | 9.38271  | -0.51269 | -1.29654 |
| H    | 9.02289  | 1.21691  | -1.40556 |
| H    | 8.93804  | 0.20217  | -2.85438 |

**Table S4.** Coordinates (Ångstroms) for conformer (*P*, *S*)-C3 of neurymenolide A (Energy: -1159.524025 Hartree, Solvent: CH<sub>3</sub>OH, Boltzmann %: 3.542869499).

| Atom | X        | Y        | Z        |
|------|----------|----------|----------|
| O    | -1.15511 | -1.73618 | 0.10966  |
| C    | -2.03415 | -1.93551 | 1.12344  |
| C    | -1.95685 | -1.17913 | 2.24364  |
| C    | -0.95992 | -0.15783 | 2.32487  |
| C    | -0.08256 | 0.10317  | 1.28249  |
| C    | -0.18102 | -0.72237 | 0.10899  |
| O    | 0.48356  | -0.65688 | -0.92151 |
| C    | 0.95817  | 1.21921  | 1.4233   |
| C    | 0.38679  | 2.64281  | 1.29926  |
| C    | -0.29524 | 3.22891  | 0.30325  |
| O    | -0.98784 | 0.51945  | 3.49102  |
| C    | -0.72434 | 2.6755   | -1.03334 |
| C    | -2.1498  | 3.05264  | -1.38319 |
| C    | -3.05328 | 2.31452  | -2.04757 |
| C    | -2.87657 | 0.9245   | -2.60218 |
| C    | -4.00122 | -0.05945 | -2.21556 |
| C    | -4.20455 | -0.21215 | -0.69661 |
| C    | -4.86413 | -1.54448 | -0.2868  |
| C    | -3.95036 | -2.78434 | -0.37558 |
| C    | -3.02901 | -3.01929 | 0.84795  |
| C    | 2.21895  | 1.08967  | 0.58521  |
| C    | 3.43647  | 0.9374   | 1.12071  |
| C    | 4.73069  | 0.90916  | 0.3417   |
| C    | 5.58114  | -0.29933 | 0.66608  |
| C    | 6.25583  | -1.0854  | -0.18801 |
| C    | 6.33818  | -0.97848 | -1.68927 |
| C    | 6.04294  | -2.31314 | -2.3955  |
| H    | -2.64744 | -1.32608 | 3.06892  |
| H    | 1.31674  | 1.14819  | 2.4627   |
| H    | 0.63243  | 3.2771   | 2.15382  |
| H    | -0.5558  | 4.28029  | 0.45491  |
| H    | -0.24165 | 1.14011  | 3.62003  |
| H    | -0.56027 | 1.5994   | -1.09645 |
| H    | -0.06003 | 3.12377  | -1.79399 |
| H    | -2.44536 | 4.05904  | -1.07537 |
| H    | -4.03245 | 2.76652  | -2.23055 |
| H    | -1.91398 | 0.5059   | -2.28893 |
| H    | -2.84006 | 0.98581  | -3.701   |
| H    | -3.75696 | -1.03246 | -2.66123 |
| H    | -4.94715 | 0.25752  | -2.67715 |
| H    | -4.81981 | 0.61912  | -0.32999 |
| H    | -3.23971 | -0.10315 | -0.19038 |
| H    | -5.74155 | -1.70964 | -0.92747 |
| H    | -5.25147 | -1.46261 | 0.73845  |

**Table S4.** *Cont.*

| Atom | X        | Y        | Z        |
|------|----------|----------|----------|
| H    | -3.33819 | -2.74322 | -1.28457 |
| H    | -4.57049 | -3.68419 | -0.4673  |
| H    | -3.63768 | -3.14976 | 1.74955  |
| H    | -2.47718 | -3.95656 | 0.6902   |
| H    | 2.10799  | 1.18653  | -0.49209 |
| H    | 3.53258  | 0.83887  | 2.2067   |
| H    | 5.3081   | 1.81199  | 0.60654  |
| H    | 4.52354  | 0.98011  | -0.73104 |
| H    | 5.65805  | -0.52966 | 1.73193  |
| H    | 6.83478  | -1.90753 | 0.24274  |
| H    | 7.35465  | -0.65712 | -1.96406 |
| H    | 5.66141  | -0.20377 | -2.06568 |
| H    | 5.01968  | -2.64846 | -2.1924  |
| H    | 6.72596  | -3.09952 | -2.0531  |
| H    | 6.15927  | -2.21728 | -3.48063 |

**Table S5.** Coordinates (Ångstroms) for conformer (*P*, *S*)-C4 of neurymenolide A (Energy: -1159.524056 Hartree, Solvent: CH<sub>3</sub>OH, Boltzmann %: 3.658341442).

| Atom | X        | Y        | Z        |
|------|----------|----------|----------|
| O    | -1.15106 | -1.72755 | -0.12639 |
| C    | -2.00628 | -2.07076 | 0.86922  |
| C    | -1.9143  | -1.46667 | 2.07728  |
| C    | -0.92667 | -0.45214 | 2.27431  |
| C    | -0.0745  | -0.04336 | 1.25841  |
| C    | -0.18853 | -0.70952 | -0.01178 |
| O    | 0.45252  | -0.49951 | -1.03788 |
| C    | 0.95874  | 1.05747  | 1.52055  |
| C    | 0.38764  | 2.48624  | 1.54917  |
| C    | -0.29936 | 3.18149  | 0.62969  |
| O    | -0.9413  | 0.06663  | 3.51968  |
| C    | -0.74522 | 2.78866  | -0.75719 |
| C    | -2.17696 | 3.19782  | -1.03933 |
| C    | -3.09249 | 2.53357  | -1.76247 |
| C    | -2.92614 | 1.21132  | -2.4657  |
| C    | -4.03935 | 0.18622  | -2.16203 |
| C    | -4.20419 | -0.13425 | -0.66489 |
| C    | -4.85925 | -1.50223 | -0.38688 |
| C    | -3.96958 | -2.73127 | -0.66648 |
| C    | -2.99425 | -3.12309 | 0.47294  |
| C    | 2.22097  | 1.01759  | 0.67548  |
| C    | 3.44101  | 0.83091  | 1.19404  |
| C    | 4.73167  | 0.87351  | 0.4066   |
| C    | 5.59724  | -0.34297 | 0.65006  |
| C    | 5.96789  | -1.28191 | -0.23535 |
| C    | 5.64316  | -1.36076 | -1.70461 |
| C    | 6.90342  | -1.32141 | -2.58901 |
| H    | -2.58459 | -1.73182 | 2.8898   |
| H    | 1.31586  | 0.87932  | 2.54707  |
| H    | 0.64478  | 3.02505  | 2.46383  |
| H    | -0.5484  | 4.2118   | 0.89965  |
| H    | -0.17946 | 0.64704  | 3.7285   |
| H    | -0.57474 | 1.73013  | -0.95525 |
| H    | -0.09594 | 3.3344   | -1.46549 |
| H    | -2.46597 | 4.16597  | -0.62196 |
| H    | -4.07408 | 3.00203  | -1.87986 |
| H    | -1.95571 | 0.76662  | -2.22043 |
| H    | -2.91549 | 1.38974  | -3.55228 |
| H    | -3.80489 | -0.72992 | -2.71936 |
| H    | -4.99713 | 0.54865  | -2.56187 |
| H    | -4.80851 | 0.65123  | -0.19366 |
| H    | -3.22751 | -0.08178 | -0.17288 |
| H    | -5.76806 | -1.58193 | -0.9996  |
| H    | -5.1971  | -1.54046 | 0.65832  |

**Table S5.** *Cont.*

| Atom | X        | Y        | Z        |
|------|----------|----------|----------|
| H    | -3.40248 | -2.5919  | -1.59466 |
| H    | -4.60957 | -3.60669 | -0.83093 |
| H    | -3.56331 | -3.39955 | 1.3675   |
| H    | -2.4332  | -4.01347 | 0.15635  |
| H    | 2.10557  | 1.20149  | -0.38973 |
| H    | 3.54298  | 0.63986  | 2.26693  |
| H    | 5.29997  | 1.76239  | 0.72732  |
| H    | 4.51348  | 1.00812  | -0.65753 |
| H    | 5.94464  | -0.45569 | 1.68038  |
| H    | 6.5998   | -2.09429 | 0.13516  |
| H    | 4.96055  | -0.55781 | -2.00176 |
| H    | 5.11285  | -2.30533 | -1.89673 |
| H    | 7.5992   | -2.12492 | -2.31994 |
| H    | 7.43341  | -0.36904 | -2.47552 |
| H    | 6.64382  | -1.4425  | -3.64666 |

**Table S6.** Coordinates (Ångstroms) for conformer (*P*, *S*)-C5 of neurymenolide A (Energy: -1159.526388 Hartree, Solvent: CH<sub>3</sub>OH, Boltzmann %: 43.24791869).

| Atom | X        | Y        | Z        |
|------|----------|----------|----------|
| O    | -1.71651 | -1.73693 | -1.04677 |
| C    | -2.20037 | -2.30953 | 0.08603  |
| C    | -1.59331 | -2.08422 | 1.2751   |
| C    | -0.51089 | -1.14875 | 1.34143  |
| C    | -0.05928 | -0.48562 | 0.21414  |
| C    | -0.62684 | -0.85449 | -1.05647 |
| O    | -0.27513 | -0.46912 | -2.16634 |
| C    | 1.01667  | 0.59971  | 0.24336  |
| C    | 0.57661  | 1.86424  | -0.48588 |
| C    | -0.33739 | 2.75056  | -0.06384 |
| O    | -0.0407  | -0.96759 | 2.59276  |
| C    | -1.13646 | 2.7083   | 1.2222   |
| C    | -2.53678 | 3.3027   | 1.14546  |
| C    | -3.51166 | 3.01225  | 0.26784  |
| C    | -3.465   | 2.04195  | -0.88393 |
| C    | -4.56043 | 0.95296  | -0.84877 |
| C    | -4.49642 | 0.0479   | 0.39329  |
| C    | -5.2589  | -1.286   | 0.25311  |
| C    | -4.64559 | -2.33187 | -0.7006  |
| C    | -3.43233 | -3.1262  | -0.14914 |
| C    | 2.36272  | 0.04702  | -0.21245 |
| C    | 3.31356  | 0.69023  | -0.89846 |
| C    | 4.6502   | 0.08366  | -1.26656 |
| C    | 5.81004  | 0.90575  | -0.74946 |
| C    | 6.79717  | 0.51362  | 0.0721   |
| C    | 7.01382  | -0.84187 | 0.69561  |
| C    | 8.42975  | -1.38894 | 0.44208  |
| H    | -1.96307 | -2.54441 | 2.18687  |
| H    | 1.15619  | 0.87907  | 1.30206  |
| H    | 1.04     | 2.04097  | -1.45395 |
| H    | -0.54004 | 3.60803  | -0.70873 |
| H    | 0.70135  | -0.32555 | 2.66359  |
| H    | -0.58398 | 3.26396  | 1.99382  |
| H    | -1.19847 | 1.67749  | 1.59208  |
| H    | -2.76718 | 4.03961  | 1.91704  |
| H    | -4.46221 | 3.54062  | 0.38819  |
| H    | -2.48369 | 1.56082  | -0.9363  |
| H    | -3.58172 | 2.60758  | -1.82116 |
| H    | -4.45177 | 0.34954  | -1.75912 |
| H    | -5.55358 | 1.42097  | -0.90851 |
| H    | -4.90291 | 0.59294  | 1.25485  |
| H    | -3.44869 | -0.1489  | 0.64296  |
| H    | -6.27917 | -1.06708 | -0.09256 |
| H    | -5.37008 | -1.74195 | 1.24713  |

**Table S6.** *Cont.*

| <b>Atom</b> | <b>X</b> | <b>Y</b> | <b>Z</b> |
|-------------|----------|----------|----------|
| H           | -4.36577 | -1.86743 | -1.65357 |
| H           | -5.41409 | -3.07666 | -0.94063 |
| H           | -3.70226 | -3.61245 | 0.79489  |
| H           | -3.18672 | -3.92056 | -0.86746 |
| H           | 2.558    | -0.97832 | 0.11358  |
| H           | 3.15749  | 1.71938  | -1.22759 |
| H           | 4.72306  | 0.04292  | -2.36594 |
| H           | 4.69804  | -0.94924 | -0.9081  |
| H           | 5.82266  | 1.94283  | -1.09479 |
| H           | 7.55196  | 1.26063  | 0.33486  |
| H           | 6.27292  | -1.56388 | 0.33661  |
| H           | 6.8621   | -0.75811 | 1.78266  |
| H           | 9.19301  | -0.69562 | 0.81463  |
| H           | 8.6088   | -1.53793 | -0.62876 |
| H           | 8.57532  | -2.35029 | 0.94696  |

**Table S7.** Coordinates (Ångstroms) for conformer (*P*, *S*)-C6 of neurymenolide A (Energy: -1159.522899 Hartree, Solvent: CH<sub>3</sub>OH, Boltzmann %: 1.0742783).

| Atom | X        | Y        | Z        |
|------|----------|----------|----------|
| O    | -1.16455 | -1.75778 | 0.05492  |
| C    | -2.0693  | -1.98633 | 1.03864  |
| C    | -2.0253  | -1.25902 | 2.17993  |
| C    | -1.02997 | -0.24267 | 2.31817  |
| C    | -0.12964 | 0.05183  | 1.30411  |
| C    | -0.20083 | -0.73632 | 0.10351  |
| O    | 0.48026  | -0.6315  | -0.91329 |
| C    | 0.90125  | 1.16954  | 1.49606  |
| C    | 0.32519  | 2.59315  | 1.3965   |
| C    | -0.35821 | 3.19663  | 0.41187  |
| O    | -1.07926 | 0.39096  | 3.50835  |
| C    | -0.78833 | 2.66975  | -0.93496 |
| C    | -2.20705 | 3.07045  | -1.28697 |
| C    | -3.09984 | 2.36951  | -2.00373 |
| C    | -2.91352 | 1.00852  | -2.62309 |
| C    | -4.02657 | -0.00392 | -2.27744 |
| C    | -4.23174 | -0.21684 | -0.76624 |
| C    | -4.87842 | -1.57074 | -0.40996 |
| C    | -3.94274 | -2.79171 | -0.53119 |
| C    | -3.05198 | -3.06542 | 0.70669  |
| C    | 2.17351  | 1.06778  | 0.6717   |
| C    | 3.38246  | 0.87413  | 1.21295  |
| C    | 4.68185  | 0.8545   | 0.44383  |
| C    | 5.50674  | -0.38438 | 0.71253  |
| C    | 6.2214   | -1.07998 | -0.18553 |
| C    | 6.35687  | -0.78696 | -1.66409 |
| C    | 6.89053  | -1.98346 | -2.46359 |
| H    | -2.73709 | -1.43049 | 2.98216  |
| H    | 1.2441   | 1.07292  | 2.5384   |
| H    | 0.57344  | 3.21368  | 2.26035  |
| H    | -0.61795 | 4.24519  | 0.58311  |
| H    | -0.32277 | 0.98776  | 3.68281  |
| H    | -0.63987 | 1.59274  | -1.01335 |
| H    | -0.1135  | 3.11909  | -1.68552 |
| H    | -2.50638 | 4.05968  | -0.93105 |
| H    | -4.07616 | 2.83095  | -2.17805 |
| H    | -1.94531 | 0.58621  | -2.33302 |
| H    | -2.88212 | 1.12083  | -3.71791 |
| H    | -3.76782 | -0.95645 | -2.7578  |
| H    | -4.97535 | 0.31712  | -2.73009 |
| H    | -4.85381 | 0.59463  | -0.36837 |
| H    | -3.26864 | -0.1202  | -0.25417 |
| H    | -5.74739 | -1.72581 | -1.06418 |
| H    | -5.27597 | -1.52912 | 0.61371  |



**Table S7.** *Cont.*

| Atom | X        | Y        | Z        |
|------|----------|----------|----------|
| H    | -3.30381 | -2.69498 | -1.41733 |
| H    | -4.5416  | -3.69714 | -0.68549 |
| H    | -3.68202 | -3.22617 | 1.58833  |
| H    | -2.49303 | -3.99556 | 0.53314  |
| H    | 2.07788  | 1.22008  | -0.40078 |
| H    | 3.46587  | 0.72685  | 2.29447  |
| H    | 5.27736  | 1.73318  | 0.74807  |
| H    | 4.48524  | 0.97396  | -0.62731 |
| H    | 5.52603  | -0.71717 | 1.75325  |
| H    | 6.78402  | -1.94334 | 0.17957  |
| H    | 7.03248  | 0.06971  | -1.80884 |
| H    | 5.38947  | -0.47406 | -2.07817 |
| H    | 6.22119  | -2.84724 | -2.37598 |
| H    | 7.87874  | -2.29049 | -2.10133 |
| H    | 6.98498  | -1.73812 | -3.52661 |

**Table S8.** Coordinates (Ångstroms) for conformer (*M*, *S*)-C1 of neurymenolide A (Energy: -1159.526514 Hartree, Solvent: CH<sub>3</sub>OH, Boltzmann %: 48.50130954).

| Atom | X        | Y        | Z        |
|------|----------|----------|----------|
| C    | -1.02376 | -1.76379 | -0.89745 |
| C    | -1.76507 | -2.21853 | 0.14226  |
| C    | -0.69925 | -0.65362 | 1.65752  |
| C    | 0.01213  | -0.0752  | 0.5516   |
| C    | -0.12636 | -0.6702  | -0.69125 |
| O    | 0.52607  | -0.28404 | -1.80616 |
| C    | 0.85062  | 1.16548  | 0.83226  |
| C    | 0.53659  | 2.3277   | -0.11668 |
| C    | -0.56977 | 3.08755  | -0.09981 |
| O    | -0.63433 | -0.31629 | 2.83961  |
| C    | -1.73839 | 2.96451  | 0.8573   |
| C    | -3.09091 | 3.37015  | 0.28821  |
| C    | -3.76554 | 2.76323  | -0.70156 |
| C    | -3.32292 | 1.57376  | -1.512   |
| C    | -4.26317 | 0.35029  | -1.44352 |
| C    | -4.38083 | -0.2634  | -0.03809 |
| C    | -4.96939 | -1.68822 | -0.00308 |
| C    | -4.14014 | -2.80841 | -0.66379 |
| C    | -2.85156 | -3.25261 | 0.07832  |
| C    | 2.34912  | 0.90965  | 0.89515  |
| C    | 2.96825  | -0.27497 | 0.83607  |
| C    | 4.46115  | -0.46817 | 0.9736   |
| C    | 5.05512  | -1.23358 | -0.18799 |
| C    | 6.10851  | -0.89335 | -0.94802 |
| C    | 6.97989  | 0.33213  | -0.84694 |
| C    | 8.46074  | -0.01759 | -0.60887 |
| H    | 0.55947  | 1.48802  | 1.84077  |
| H    | 1.30723  | 2.57096  | -0.85323 |
| H    | -0.63991 | 3.89765  | -0.82873 |
| H    | -1.53427 | 3.60697  | 1.72613  |
| H    | -1.79234 | 1.94479  | 1.25313  |
| H    | -3.5569  | 4.239    | 0.75631  |
| H    | -4.74165 | 3.17555  | -0.97316 |
| H    | -2.31576 | 1.26587  | -1.2129  |
| H    | -3.25017 | 1.88512  | -2.56525 |
| H    | -3.87587 | -0.3966  | -2.14731 |
| H    | -5.26271 | 0.62588  | -1.80931 |
| H    | -5.01075 | 0.38464  | 0.58478  |
| H    | -3.39685 | -0.25562 | 0.4419   |
| H    | -5.95198 | -1.66834 | -0.49561 |
| H    | -5.16156 | -1.96704 | 1.04255  |
| H    | -3.88168 | -2.53946 | -1.69526 |
| H    | -4.77336 | -3.70167 | -0.73485 |
| H    | -3.09715 | -3.5574  | 1.10161  |

**Table S8.** *Cont.*

| Atom | X        | Y        | Z        |
|------|----------|----------|----------|
| H    | -2.45101 | -4.13428 | -0.43708 |
| H    | 2.94762  | 1.81387  | 1.03899  |
| H    | 2.38365  | -1.18701 | 0.69828  |
| H    | 4.64536  | -1.04791 | 1.89385  |
| H    | 4.95085  | 0.50078  | 1.11123  |
| H    | 4.55356  | -2.17823 | -0.41407 |
| H    | 6.39407  | -1.58929 | -1.74218 |
| H    | 6.63089  | 1.00152  | -0.05376 |
| H    | 6.90351  | 0.89753  | -1.78778 |
| H    | 8.84426  | -0.66993 | -1.40218 |
| H    | 8.59292  | -0.53965 | 0.34542  |
| H    | 9.07886  | 0.88687  | -0.59018 |
| H    | 1.13313  | 0.46833  | -1.67229 |
| O    | -1.58423 | -1.70138 | 1.38572  |
| H    | -1.14201 | -2.18403 | -1.89267 |

**Table S9.** Coordinates (Ångstroms) for conformer (*M*, *S*)-C2 of neurymenolide A (Energy: -1159.524569 Hartree, Solvent: CH<sub>3</sub>OH, Boltzmann %: 6.179066835).

| Atom | X        | Y        | Z        |
|------|----------|----------|----------|
| C    | -0.59132 | -2.05229 | -0.51815 |
| C    | -1.52747 | -2.31006 | 0.42971  |
| C    | -0.81183 | -0.40006 | 1.74846  |
| C    | 0.09182  | -0.03211 | 0.69769  |
| C    | 0.24195  | -0.90355 | -0.36698 |
| O    | 1.14383  | -0.71475 | -1.35362 |
| C    | 0.83971  | 1.29947  | 0.80341  |
| C    | 0.44987  | 2.2491   | -0.32489 |
| C    | -0.65695 | 3.00406  | -0.39617 |
| O    | -0.99466 | 0.18321  | 2.81706  |
| C    | -1.76437 | 3.13087  | 0.62508  |
| C    | -3.17259 | 3.26655  | 0.05899  |
| C    | -3.77571 | 2.52059  | -0.88174 |
| C    | -3.22182 | 1.34659  | -1.64736 |
| C    | -4.09726 | 0.07538  | -1.57229 |
| C    | -4.26011 | -0.47066 | -0.14381 |
| C    | -4.75525 | -1.92772 | -0.05101 |
| C    | -3.79928 | -3.03271 | -0.54452 |
| C    | -2.58505 | -3.37136 | 0.36514  |
| C    | 2.33733  | 1.05082  | 0.92905  |
| C    | 3.33504  | 1.66387  | 0.27579  |
| C    | 4.79975  | 1.36567  | 0.50631  |
| C    | 5.50896  | 0.94539  | -0.76185 |
| C    | 6.21911  | -0.17487 | -0.97069 |
| C    | 6.49129  | -1.30313 | -0.00932 |
| C    | 6.0201   | -2.66479 | -0.55176 |
| H    | 0.51838  | 1.73397  | 1.75829  |
| H    | 1.12851  | 2.29842  | -1.17707 |
| H    | -0.78177 | 3.62143  | -1.28852 |
| H    | -1.56868 | 4.03536  | 1.21997  |
| H    | -1.72802 | 2.30078  | 1.34046  |
| H    | -3.76233 | 4.07246  | 0.49984  |
| H    | -4.80607 | 2.78724  | -1.13639 |
| H    | -2.21248 | 1.1063   | -1.29946 |
| H    | -3.1264  | 1.63105  | -2.70669 |
| H    | -3.63412 | -0.68203 | -2.21724 |
| H    | -5.08814 | 0.27942  | -2.00297 |
| H    | -4.96802 | 0.16665  | 0.4015   |
| H    | -3.31104 | -0.36564 | 0.38894  |
| H    | -5.68766 | -2.01359 | -0.62718 |
| H    | -5.02539 | -2.14387 | 0.99216  |
| H    | -3.43292 | -2.80576 | -1.5535  |
| H    | -4.37588 | -3.96184 | -0.63501 |
| H    | -2.93068 | -3.58381 | 1.38325  |

**Table S9.** *Cont.*

| Atom | X        | Y        | Z        |
|------|----------|----------|----------|
| H    | -2.12022 | -4.28542 | -0.0225  |
| H    | 2.59372  | 0.2853   | 1.66682  |
| H    | 3.12255  | 2.44169  | -0.46028 |
| H    | 4.90542  | 0.61363  | 1.29415  |
| H    | 5.27847  | 2.28582  | 0.88019  |
| H    | 5.42032  | 1.65217  | -1.59087 |
| H    | 6.66214  | -0.30555 | -1.96228 |
| H    | 6.0253   | -1.11515 | 0.96363  |
| H    | 7.57521  | -1.35704 | 0.17259  |
| H    | 6.49159  | -2.89024 | -1.51554 |
| H    | 4.93478  | -2.67383 | -0.70114 |
| H    | 6.27458  | -3.47254 | 0.14329  |
| H    | 1.77706  | -0.01255 | -1.11792 |
| O    | -1.59206 | -1.54528 | 1.55119  |
| H    | -0.5006  | -2.67858 | -1.40194 |

**Table S10.** Coordinates (Ångstroms) for conformer (*M*, *S*)-C3 of neurymenolide A (Energy: -1159.52477 Hartree, Solvent: CH<sub>3</sub>OH, Boltzmann %: 7.648656514).

| Atom | X        | Y        | Z        |
|------|----------|----------|----------|
| C    | -0.6612  | -2.09966 | -0.55545 |
| C    | -1.61613 | -2.34972 | 0.37555  |
| C    | -0.8923  | -0.46114 | 1.72074  |
| C    | 0.03219  | -0.09939 | 0.6868   |
| C    | 0.18697  | -0.96527 | -0.38161 |
| O    | 1.10713  | -0.77888 | -1.35218 |
| C    | 0.79131  | 1.22432  | 0.80635  |
| C    | 0.39082  | 2.19229  | -0.30238 |
| C    | -0.706   | 2.96373  | -0.34289 |
| O    | -1.0814  | 0.11602  | 2.79136  |
| C    | -1.78692 | 3.10043  | 0.70453  |
| C    | -3.20689 | 3.25793  | 0.17548  |
| C    | -3.83769 | 2.54745  | -0.77466 |
| C    | -3.31468 | 1.39474  | -1.59319 |
| C    | -4.21102 | 0.1366   | -1.55099 |
| C    | -4.35787 | -0.4626  | -0.14201 |
| C    | -4.85304 | -1.92206 | -0.1004  |
| C    | -3.89384 | -3.0088  | -0.62777 |
| C    | -2.69191 | -3.38979 | 0.28211  |
| C    | 2.28921  | 0.96343  | 0.90209  |
| C    | 3.27881  | 1.58266  | 0.24174  |
| C    | 4.74561  | 1.26917  | 0.4361   |
| C    | 5.42592  | 0.8836   | -0.85877 |
| C    | 6.05432  | -0.26814 | -1.14405 |
| C    | 6.25711  | -1.46902 | -0.25666 |
| C    | 7.74619  | -1.7883  | -0.02718 |
| H    | 0.48808  | 1.64552  | 1.773    |
| H    | 1.04953  | 2.23576  | -1.17034 |
| H    | -0.84213 | 3.58863  | -1.22831 |
| H    | -1.56468 | 3.99986  | 1.29803  |
| H    | -1.74487 | 2.26737  | 1.41629  |
| H    | -3.78189 | 4.05119  | 0.65709  |
| H    | -4.87187 | 2.83007  | -0.99421 |
| H    | -2.30414 | 1.12515  | -1.27136 |
| H    | -3.2313  | 1.71695  | -2.64272 |
| H    | -3.77475 | -0.60383 | -2.23371 |
| H    | -5.20594 | 0.37548  | -1.95358 |
| H    | -5.05835 | 0.1539   | 0.43599  |
| H    | -3.40255 | -0.37839 | 0.38293  |
| H    | -5.78208 | -1.98838 | -0.68451 |
| H    | -5.12891 | -2.17415 | 0.93314  |
| H    | -3.51351 | -2.73956 | -1.62123 |
| H    | -4.47172 | -3.93128 | -0.76559 |
| H    | -3.04826 | -3.61896 | 1.29289  |

**Table S10.** *Cont.*

| Atom | X        | Y        | Z        |
|------|----------|----------|----------|
| H    | -2.24083 | -4.30277 | -0.1237  |
| H    | 2.55397  | 0.18282  | 1.62093  |
| H    | 3.05733  | 2.37602  | -0.47481 |
| H    | 4.86036  | 0.49304  | 1.1987   |
| H    | 5.23808  | 2.17462  | 0.82668  |
| H    | 5.38471  | 1.64579  | -1.64106 |
| H    | 6.49107  | -0.36188 | -2.14257 |
| H    | 5.78406  | -2.34047 | -0.7333  |
| H    | 5.75847  | -1.3367  | 0.70922  |
| H    | 8.24595  | -0.97145 | 0.50533  |
| H    | 8.26918  | -1.9357  | -0.97933 |
| H    | 7.86354  | -2.70246 | 0.56523  |
| H    | 1.74997  | -0.09288 | -1.09136 |
| O    | -1.68479 | -1.59446 | 1.50318  |
| H    | -0.56789 | -2.71953 | -1.44349 |

**Table S11.** Coordinates (Ångstroms) for conformer (*M*, *S*)-C4 of neurymenolide A (Energy: -1159.525181 Hartree, Solvent: CH<sub>3</sub>OH, Boltzmann %: 11.82461926).

| Atom | X        | Y        | Z        |
|------|----------|----------|----------|
| C    | -1.36206 | -2.1439  | -0.6327  |
| C    | -2.39478 | -2.19553 | 0.24583  |
| C    | -1.27671 | -0.64913 | 1.74994  |
| C    | -0.23275 | -0.48521 | 0.78117  |
| C    | -0.25889 | -1.28559 | -0.34701 |
| O    | 0.72348  | -1.28543 | -1.27355 |
| C    | 0.8544   | 0.56065  | 1.03992  |
| C    | 0.82044  | 1.67722  | -0.00069 |
| C    | -0.04032 | 2.7049   | -0.05578 |
| O    | -1.36813 | -0.10709 | 2.85081  |
| C    | -1.15906 | 3.03723  | 0.90477  |
| C    | -2.43399 | 3.57521  | 0.26614  |
| C    | -3.12787 | 3.07396  | -0.76951 |
| C    | -2.82731 | 1.84465  | -1.58751 |
| C    | -4.01561 | 0.86627  | -1.71892 |
| C    | -4.50687 | 0.31157  | -0.3708  |
| C    | -5.37126 | -0.96105 | -0.4644  |
| C    | -4.67809 | -2.25183 | -0.9448  |
| C    | -3.6893  | -2.92676 | 0.04544  |
| C    | 2.21054  | -0.11935 | 1.18555  |
| C    | 3.3803   | 0.24364  | 0.63814  |
| C    | 4.68676  | -0.48473 | 0.86575  |
| C    | 5.23526  | -1.08153 | -0.41233 |
| C    | 6.32773  | -0.70367 | -1.0959  |
| C    | 7.30068  | 0.39908  | -0.76936 |
| C    | 8.74373  | -0.11516 | -0.61423 |
| H    | 0.61728  | 0.98736  | 2.02306  |
| H    | 1.55684  | 1.61674  | -0.80247 |
| H    | 0.07635  | 3.40603  | -0.88511 |
| H    | -0.79088 | 3.81395  | 1.59142  |
| H    | -1.39182 | 2.17551  | 1.54124  |
| H    | -2.8294  | 4.47965  | 0.73232  |
| H    | -4.02829 | 3.61806  | -1.07041 |
| H    | -1.96874 | 1.31134  | -1.16851 |
| H    | -2.5328  | 2.15898  | -2.60079 |
| H    | -3.69448 | 0.04477  | -2.37173 |
| H    | -4.84947 | 1.36083  | -2.23765 |
| H    | -5.09218 | 1.08642  | 0.14082  |
| H    | -3.64541 | 0.12871  | 0.27786  |
| H    | -6.21074 | -0.76211 | -1.14596 |
| H    | -5.82179 | -1.15563 | 0.51906  |
| H    | -4.16313 | -2.0825  | -1.89865 |
| H    | -5.45767 | -2.99611 | -1.15051 |
| H    | -4.17058 | -3.06041 | 1.02085  |



**Table S11.** *Cont.*

| Atom | X        | Y        | Z        |
|------|----------|----------|----------|
| H    | -3.45311 | -3.92434 | -0.34347 |
| H    | 2.19577  | -0.99458 | 1.8413   |
| H    | 3.44371  | 1.11692  | -0.01315 |
| H    | 4.52906  | -1.28566 | 1.60081  |
| H    | 5.41019  | 0.21409  | 1.30291  |
| H    | 4.64748  | -1.90989 | -0.81523 |
| H    | 6.56186  | -1.26159 | -2.0072  |
| H    | 7.00191  | 0.93598  | 0.13746  |
| H    | 7.27986  | 1.13602  | -1.58607 |
| H    | 9.07337  | -0.64262 | -1.51704 |
| H    | 8.82507  | -0.81131 | 0.22798  |
| H    | 9.43762  | 0.71412  | -0.43793 |
| H    | 1.50473  | -0.80014 | -0.95029 |
| O    | -2.32844 | -1.51406 | 1.41926  |
| H    | -1.38569 | -2.7115  | -1.55936 |

**Table S12.** Coordinates (Ångstroms) for conformer (*M*, *S*)-C5 of neurymenolide A (Energy: -1159.525135 Hartree, Solvent: CH<sub>3</sub>OH, Boltzmann %: 11.25715394).

| Atom | X        | Y        | Z        |
|------|----------|----------|----------|
| C    | -1.43525 | -2.13137 | -0.77761 |
| C    | -2.47831 | -2.18667 | 0.08835  |
| C    | -1.29947 | -0.79957 | 1.69712  |
| C    | -0.24198 | -0.62011 | 0.74553  |
| C    | -0.29524 | -1.34636 | -0.43089 |
| O    | 0.69383  | -1.33493 | -1.35002 |
| C    | 0.88424  | 0.36367  | 1.07232  |
| C    | 0.9064   | 1.53629  | 0.09576  |
| C    | 0.09525  | 2.60479  | 0.10019  |
| O    | -1.37305 | -0.32768 | 2.83146  |
| C    | -1.0068  | 2.93097  | 1.08191  |
| C    | -2.24338 | 3.59386  | 0.48809  |
| C    | -2.9622  | 3.22082  | -0.58391 |
| C    | -2.7377  | 2.04702  | -1.50202 |
| C    | -3.96912 | 1.12684  | -1.66017 |
| C    | -4.43439 | 0.4943   | -0.33767 |
| C    | -5.36846 | -0.72284 | -0.48693 |
| C    | -4.76383 | -2.00938 | -1.08413 |
| C    | -3.80986 | -2.82694 | -0.16918 |
| C    | 2.21065  | -0.37629 | 1.19213  |
| C    | 3.40474  | -0.01294 | 0.70103  |
| C    | 4.68218  | -0.7945  | 0.91466  |
| C    | 5.29149  | -1.27262 | -0.38555 |
| C    | 6.49576  | -0.96598 | -0.89507 |
| C    | 7.55612  | -0.06355 | -0.31926 |
| C    | 7.95775  | 1.06481  | -1.28712 |
| H    | 0.65175  | 0.74361  | 2.07557  |
| H    | 1.64285  | 1.48658  | -0.70707 |
| H    | 0.24664  | 3.34771  | -0.68605 |
| H    | -0.59551 | 3.62667  | 1.82835  |
| H    | -1.29642 | 2.03803  | 1.64806  |
| H    | -2.58717 | 4.47868  | 1.02707  |
| H    | -3.82945 | 3.83907  | -0.83533 |
| H    | -1.8868  | 1.45005  | -1.15926 |
| H    | -2.46803 | 2.42739  | -2.49937 |
| H    | -3.70515 | 0.34407  | -2.38261 |
| H    | -4.7997  | 1.69052  | -2.10901 |
| H    | -4.95615 | 1.2558   | 0.25605  |
| H    | -3.55736 | 0.22001  | 0.25552  |
| H    | -6.21943 | -0.43133 | -1.11924 |
| H    | -5.79462 | -0.96472 | 0.49689  |
| H    | -4.24972 | -1.79302 | -2.02895 |
| H    | -5.59051 | -2.68466 | -1.33838 |
| H    | -4.29569 | -3.02419 | 0.79313  |

**Table S12.** *Cont.*

| Atom | X        | Y        | Z        |
|------|----------|----------|----------|
| H    | -3.62922 | -3.79505 | -0.65096 |
| H    | 2.15051  | -1.29549 | 1.78183  |
| H    | 3.51053  | 0.90475  | 0.11957  |
| H    | 4.46758  | -1.66132 | 1.55547  |
| H    | 5.3949   | -0.16489 | 1.46114  |
| H    | 4.65756  | -1.95117 | -0.96148 |
| H    | 6.75899  | -1.42065 | -1.85454 |
| H    | 8.44958  | -0.66716 | -0.09969 |
| H    | 7.23349  | 0.36853  | 0.6339   |
| H    | 7.10926  | 1.72668  | -1.49371 |
| H    | 8.30517  | 0.6583   | -2.24417 |
| H    | 8.76728  | 1.67127  | -0.86639 |
| H    | 1.49221  | -0.90131 | -0.99765 |
| O    | -2.38717 | -1.5891  | 1.30556  |
| H    | -1.47779 | -2.63463 | -1.74015 |

**Table S13.** Coordinates (Ångstroms) for conformer (*M*, *S*)-C6 of neurymenolide A (Energy: -1159.52538 Hartree, Solvent: CH<sub>3</sub>OH, Boltzmann %: 14.58919391).

| Atom | X        | Y        | Z        |
|------|----------|----------|----------|
| C    | -1.67766 | -2.13665 | -0.85547 |
| C    | -2.60845 | -2.17613 | 0.13077  |
| C    | -1.21304 | -0.82522 | 1.58813  |
| C    | -0.27186 | -0.66536 | 0.51778  |
| C    | -0.4844  | -1.38082 | -0.64728 |
| O    | 0.38214  | -1.38678 | -1.6824  |
| C    | 0.91397  | 0.28061  | 0.7194   |
| C    | 0.86122  | 1.46616  | -0.2414  |
| C    | 0.08601  | 2.55652  | -0.13991 |
| O    | -1.13806 | -0.3579  | 2.72424  |
| C    | -0.89871 | 2.90015  | 0.95473  |
| C    | -2.17996 | 3.58291  | 0.49131  |
| C    | -3.01893 | 3.20763  | -0.48859 |
| C    | -2.91785 | 2.01105  | -1.39935 |
| C    | -4.18844 | 1.13286  | -1.43321 |
| C    | -4.55239 | 0.52784  | -0.06712 |
| C    | -5.5262  | -0.66567 | -0.11969 |
| C    | -5.01398 | -1.96804 | -0.76793 |
| C    | -3.97295 | -2.79279 | 0.03805  |
| C    | 2.22507  | -0.49465 | 0.67692  |
| C    | 3.37539  | -0.1258  | 0.09508  |
| C    | 4.65192  | -0.9359  | 0.14691  |
| C    | 5.73365  | -0.22381 | 0.93079  |
| C    | 6.89235  | 0.27459  | 0.46939  |
| C    | 7.42907  | 0.24699  | -0.93825 |
| C    | 8.78335  | -0.4788  | -1.03934 |
| H    | 0.81241  | 0.65741  | 1.74563  |
| H    | 1.51129  | 1.40891  | -1.11529 |
| H    | 0.17495  | 3.30532  | -0.93011 |
| H    | -0.39932 | 3.58913  | 1.65193  |
| H    | -1.14106 | 2.01189  | 1.54974  |
| H    | -2.44219 | 4.48556  | 1.0463   |
| H    | -3.89522 | 3.84046  | -0.65895 |
| H    | -2.06166 | 1.38958  | -1.11931 |
| H    | -2.72256 | 2.36505  | -2.42348 |
| H    | -4.01577 | 0.33436  | -2.16582 |
| H    | -5.03721 | 1.71939  | -1.81335 |
| H    | -5.00096 | 1.30904  | 0.55992  |
| H    | -3.63456 | 0.23667  | 0.45142  |
| H    | -6.42686 | -0.35531 | -0.66855 |
| H    | -5.86035 | -0.89499 | 0.90196  |
| H    | -4.61096 | -1.76923 | -1.76874 |
| H    | -5.87571 | -2.63093 | -0.91615 |
| H    | -4.34503 | -2.97254 | 1.05304  |

**Table S13.** *Cont.*

| Atom | X        | Y        | Z        |
|------|----------|----------|----------|
| H    | -3.86753 | -3.76909 | -0.44989 |
| H    | 2.19851  | -1.44427 | 1.21878  |
| H    | 3.44976  | 0.82683  | -0.43227 |
| H    | 4.99159  | -1.14139 | -0.87514 |
| H    | 4.44259  | -1.90601 | 0.61814  |
| H    | 5.51514  | -0.10055 | 1.99424  |
| H    | 7.54877  | 0.76132  | 1.19658  |
| H    | 7.56392  | 1.28392  | -1.28067 |
| H    | 6.71262  | -0.21375 | -1.62675 |
| H    | 8.68555  | -1.53451 | -0.7628  |
| H    | 9.52449  | -0.02563 | -0.37057 |
| H    | 9.17842  | -0.43003 | -2.06008 |
| H    | 1.22956  | -0.97221 | -1.43809 |
| O    | -2.35872 | -1.585   | 1.32881  |
| H    | -1.84854 | -2.63303 | -1.80721 |

**Table S14.** Coordinates (Ångstroms) for conformer (*M*, *R*)-C1 of neurymenolide A (Energy: -1159.525335 Hartree, Solvent: CH<sub>3</sub>OH, Boltzmann %: 13.35348954).

| Atom | X        | Y        | Z        |
|------|----------|----------|----------|
| O    | 1.72924  | -1.55272 | -0.98038 |
| C    | 2.39956  | -2.23833 | -0.02073 |
| C    | 1.94829  | -2.23068 | 1.25588  |
| C    | 0.78286  | -1.46758 | 1.57637  |
| C    | 0.11023  | -0.71322 | 0.62603  |
| C    | 0.59899  | -0.75666 | -0.72538 |
| O    | 0.15625  | -0.17108 | -1.71021 |
| C    | -1.12209 | 0.10284  | 1.032    |
| C    | -0.798   | 1.36529  | 1.84884  |
| C    | -0.04924 | 2.43425  | 1.53769  |
| O    | 0.43836  | -1.54376 | 2.87817  |
| C    | 0.71948  | 2.74265  | 0.27584  |
| C    | 2.09125  | 3.31712  | 0.56624  |
| C    | 3.23273  | 3.09974  | -0.10607 |
| C    | 3.43825  | 2.22373  | -1.31465 |
| C    | 4.62856  | 1.24889  | -1.19426 |
| C    | 4.54063  | 0.29825  | 0.01452  |
| C    | 5.33868  | -1.00914 | -0.16446 |
| C    | 4.71413  | -2.03132 | -1.1363  |
| C    | 3.61888  | -2.94326 | -0.5283  |
| C    | -2.11735 | 0.43121  | -0.06677 |
| C    | -3.36158 | -0.06298 | -0.09455 |
| C    | -4.41301 | 0.2968   | -1.12    |
| C    | -5.59558 | 1.00469  | -0.49477 |
| C    | -6.87774 | 0.6056   | -0.46381 |
| C    | -7.48193 | -0.65021 | -1.03745 |
| C    | -8.22477 | -1.48312 | 0.02338  |
| H    | 2.46663  | -2.77832 | 2.03764  |
| H    | -1.68495 | -0.54719 | 1.72111  |
| H    | -1.30968 | 1.39769  | 2.81317  |
| H    | -0.00858 | 3.22756  | 2.28938  |
| H    | -0.42222 | -1.13136 | 3.0974   |
| H    | 0.77087  | 1.87937  | -0.38873 |
| H    | 0.14239  | 3.50878  | -0.27262 |
| H    | 2.12553  | 4.01036  | 1.41077  |
| H    | 4.12628  | 3.62589  | 0.24233  |
| H    | 2.53039  | 1.65096  | -1.53348 |
| H    | 3.61179  | 2.86755  | -2.19094 |
| H    | 4.67609  | 0.66901  | -2.12517 |
| H    | 5.56899  | 1.81553  | -1.14106 |
| H    | 4.90287  | 0.81871  | 0.90994  |
| H    | 3.48988  | 0.06768  | 0.21916  |
| H    | 6.34543  | -0.75472 | -0.52411 |
| H    | 5.48134  | -1.49023 | 0.81331  |

**Table S14.** *Cont.*

| Atom | X        | Y        | Z        |
|------|----------|----------|----------|
| H    | 4.30993  | -1.52132 | -2.01898 |
| H    | 5.49825  | -2.70279 | -1.5065  |
| H    | 4.03882  | -3.51991 | 0.30319  |
| H    | 3.30222  | -3.66317 | -1.29596 |
| H    | -1.80052 | 1.14143  | -0.82678 |
| H    | -3.67311 | -0.77108 | 0.67891  |
| H    | -3.96061 | 0.95175  | -1.8781  |
| H    | -4.74183 | -0.61084 | -1.6406  |
| H    | -5.34836 | 1.95238  | -0.01002 |
| H    | -7.59132 | 1.2627   | 0.042    |
| H    | -8.19937 | -0.36921 | -1.82311 |
| H    | -6.71968 | -1.26928 | -1.52211 |
| H    | -7.53684 | -1.83503 | 0.80034  |
| H    | -9.00663 | -0.89073 | 0.51306  |
| H    | -8.70212 | -2.35901 | -0.42978 |

**Table S15.** Coordinates (Ångstroms) for conformer (*M*, *R*)-C2 of neurymenolide A (Energy: -1159.52616825 Hartree, Solvent: CH<sub>3</sub>OH, Boltzmann %: 32.27243278).

| Atom | X        | Y        | Z        |
|------|----------|----------|----------|
| O    | 1.83683  | -1.41973 | -1.13815 |
| C    | 2.72178  | -2.07577 | -0.35134 |
| C    | 2.4578   | -2.25346 | 0.9669   |
| C    | 1.25786  | -1.69979 | 1.51016  |
| C    | 0.36144  | -0.97672 | 0.73654  |
| C    | 0.64905  | -0.82765 | -0.65923 |
| O    | -0.00423 | -0.23845 | -1.5172  |
| C    | -0.90144 | -0.41804 | 1.40224  |
| C    | -0.63184 | 0.77658  | 2.33129  |
| C    | -0.12685 | 1.98807  | 2.05386  |
| O    | 0.97682  | -1.85985 | 2.81761  |
| C    | 0.34737  | 2.5529   | 0.73522  |
| C    | 1.65168  | 3.31067  | 0.87579  |
| C    | 2.69446  | 3.32478  | 0.03022  |
| C    | 2.83403  | 2.58708  | -1.27638 |
| C    | 4.16178  | 1.81516  | -1.42943 |
| C    | 4.41058  | 0.77165  | -0.32453 |
| C    | 5.37562  | -0.358   | -0.73801 |
| C    | 4.7958   | -1.39637 | -1.7206  |
| C    | 3.95126  | -2.52567 | -1.07777 |
| C    | -2.07367 | -0.11859 | 0.48682  |
| C    | -3.23212 | -0.78807 | 0.53689  |
| C    | -4.44296 | -0.48434 | -0.30811 |
| C    | -5.69694 | -0.22236 | 0.50598  |
| C    | -6.9202  | -0.03293 | -0.01218 |
| C    | -7.25598 | -0.0523  | -1.48735 |
| C    | -8.73319 | 0.24064  | -1.77785 |
| H    | 3.16266  | -2.78135 | 1.60594  |
| H    | -1.24022 | -1.22195 | 2.06717  |
| H    | -0.94473 | 0.60282  | 3.36206  |
| H    | -0.06708 | 2.69182  | 2.88894  |
| H    | 1.66334  | -2.40086 | 3.27936  |
| H    | 0.40456  | 1.78346  | -0.03619 |
| H    | -0.42127 | 3.26824  | 0.39174  |
| H    | 1.71927  | 3.93479  | 1.77085  |
| H    | 3.54627  | 3.95664  | 0.2985   |
| H    | 1.99975  | 1.89117  | -1.41627 |
| H    | 2.7664   | 3.31485  | -2.1001  |
| H    | 4.14809  | 1.32566  | -2.4118  |
| H    | 5.00244  | 2.52309  | -1.45417 |
| H    | 4.81267  | 1.27599  | 0.56312  |
| H    | 3.45288  | 0.34666  | -0.0073  |
| H    | 6.26506  | 0.09639  | -1.19645 |
| H    | 5.73419  | -0.88158 | 0.15936  |



**Table S15.** *Cont.*

| Atom | X        | Y        | Z        |
|------|----------|----------|----------|
| H    | 4.2008   | -0.89865 | -2.49557 |
| H    | 5.62059  | -1.89457 | -2.24443 |
| H    | 4.56776  | -3.09281 | -0.37153 |
| H    | 3.64388  | -3.22119 | -1.87128 |
| H    | -1.96731 | 0.71613  | -0.20236 |
| H    | -3.33418 | -1.62482 | 1.23514  |
| H    | -4.22987 | 0.37499  | -0.96114 |
| H    | -4.63204 | -1.33137 | -0.98787 |
| H    | -5.57689 | -0.1824  | 1.59042  |
| H    | -7.74821 | 0.15291  | 0.67621  |
| H    | -6.62712 | 0.67734  | -2.01884 |
| H    | -6.9871  | -1.03087 | -1.91342 |
| H    | -9.38402 | -0.49886 | -1.2966  |
| H    | -9.02004 | 1.23008  | -1.40285 |
| H    | -8.93784 | 0.21749  | -2.85337 |

**Table S16.** Coordinates (Ångstroms) for conformer (*M*, *R*)-C3 of neurymenolide A (Energy: -1159.524024 Hartree, Solvent: CH<sub>3</sub>OH, Boltzmann %: 3.331623655).

| Atom | X        | Y        | Z        |
|------|----------|----------|----------|
| O    | 1.15524  | -1.73569 | 0.10942  |
| C    | 2.03405  | -1.93546 | 1.12331  |
| C    | 1.95661  | -1.17943 | 2.24375  |
| C    | 0.95979  | -0.15804 | 2.32512  |
| C    | 0.0826   | 0.10332  | 1.28267  |
| C    | 0.18118  | -0.72185 | 0.10894  |
| O    | -0.48314 | -0.65582 | -0.92169 |
| C    | -0.95815 | 1.21931  | 1.42356  |
| C    | -0.38682 | 2.64291  | 1.29937  |
| C    | 0.29499  | 3.22894  | 0.30317  |
| O    | 0.98753  | 0.51879  | 3.49153  |
| C    | 0.72389  | 2.67539  | -1.03342 |
| C    | 2.14925  | 3.05264  | -1.38355 |
| C    | 3.05277  | 2.31449  | -2.04784 |
| C    | 2.8762   | 0.92435  | -2.60217 |
| C    | 4.00107  | -0.05934 | -2.21554 |
| C    | 4.20438  | -0.21204 | -0.69659 |
| C    | 4.86399  | -1.54435 | -0.2868  |
| C    | 3.95028  | -2.78424 | -0.37574 |
| C    | 3.02882  | -3.01928 | 0.84769  |
| C    | -2.21887 | 1.08971  | 0.58541  |
| C    | -3.43643 | 0.93752  | 1.12082  |
| C    | -4.73055 | 0.90904  | 0.34168  |
| C    | -5.5809  | -0.29951 | 0.66609  |
| C    | -6.2554  | -1.08572 | -0.18801 |
| C    | -6.33758 | -0.9789  | -1.68928 |
| C    | -6.04181 | -2.31349 | -2.39541 |
| H    | 2.64703  | -1.32674 | 3.06911  |
| H    | -1.31674 | 1.14831  | 2.46295  |
| H    | -0.6324  | 3.27729  | 2.1539   |
| H    | 0.55551  | 4.28036  | 0.45465  |
| H    | 0.24152  | 1.13965  | 3.62054  |
| H    | 0.55991  | 1.59925  | -1.09635 |
| H    | 0.05941  | 3.1235   | -1.79401 |
| H    | 2.44471  | 4.05915  | -1.07596 |
| H    | 4.03187  | 2.7666   | -2.23099 |
| H    | 1.91373  | 0.50564  | -2.28869 |
| H    | 2.8395   | 0.98546  | -3.701   |
| H    | 3.75702  | -1.0324  | -2.66122 |
| H    | 4.94694  | 0.25784  | -2.67712 |
| H    | 4.81961  | 0.61925  | -0.32994 |
| H    | 3.23953  | -0.10309 | -0.19038 |
| H    | 5.74147  | -1.70944 | -0.92741 |
| H    | 5.25125  | -1.46253 | 0.73849  |

**Table S16.** *Cont.*

| Atom | X        | Y        | Z        |
|------|----------|----------|----------|
| H    | 3.3382   | -2.74308 | -1.28478 |
| H    | 4.57045  | -3.68406 | -0.46745 |
| H    | 3.6374   | -3.14999 | 1.74931  |
| H    | 2.4769   | -3.95647 | 0.68973  |
| H    | -2.10781 | 1.18638  | -0.49191 |
| H    | -3.53264 | 0.83917  | 2.20682  |
| H    | -5.30809 | 1.81184  | 0.6063   |
| H    | -4.52326 | 0.97985  | -0.73105 |
| H    | -5.65782 | -0.52983 | 1.73195  |
| H    | -6.83424 | -1.90794 | 0.24272  |
| H    | -7.35411 | -0.65786 | -1.96423 |
| H    | -5.66098 | -0.20401 | -2.06562 |
| H    | -5.01848 | -2.64849 | -2.19215 |
| H    | -6.72464 | -3.10008 | -2.05309 |
| H    | -6.15801 | -2.21772 | -3.48057 |

**Table S17.** Coordinates (Ångstroms) for conformer (*M*, *R*)-C4 of neurymenolide A (Energy: -1159.524027 Hartree, Solvent: CH<sub>3</sub>OH, Boltzmann %: 3.34287154).

| Atom | X        | Y        | Z        |
|------|----------|----------|----------|
| O    | 1.14594  | -1.72578 | -0.12472 |
| C    | 1.99901  | -2.06809 | 0.87308  |
| C    | 1.9072   | -1.45989 | 2.07907  |
| C    | 0.92149  | -0.44269 | 2.27204  |
| C    | 0.06945  | -0.03699 | 1.25483  |
| C    | 0.18273  | -0.7081  | -0.0128  |
| O    | -0.45679 | -0.49961 | -1.04016 |
| C    | -0.9626  | 1.06598  | 1.51277  |
| C    | -0.39138 | 2.49494  | 1.53456  |
| C    | 0.30011  | 3.18494  | 0.61444  |
| O    | 0.9373   | 0.08111  | 3.51526  |
| C    | 0.75315  | 2.78504  | -0.76807 |
| C    | 2.18651  | 3.19231  | -1.04483 |
| C    | 3.1047   | 2.52576  | -1.76248 |
| C    | 2.94031  | 1.20239  | -2.46402 |
| C    | 4.05137  | 0.17695  | -2.15373 |
| C    | 4.20927  | -0.14127 | -0.65534 |
| C    | 4.85854  | -1.51084 | -0.37182 |
| C    | 3.96672  | -2.73781 | -0.65339 |
| C    | 2.9843   | -3.12471 | 0.48169  |
| C    | -2.22575 | 1.02275  | 0.66921  |
| C    | -3.44508 | 0.83707  | 1.18983  |
| C    | -4.73696 | 0.87773  | 0.4042   |
| C    | -5.60145 | -0.33899 | 0.65058  |
| C    | -5.96673 | -1.28307 | -0.23159 |
| C    | -5.63748 | -1.36727 | -1.69953 |
| C    | -6.89512 | -1.33069 | -2.58781 |
| H    | 2.57608  | -1.72394 | 2.89309  |
| H    | -1.31872 | 0.8927   | 2.54049  |
| H    | -0.6533  | 3.03946  | 2.44447  |
| H    | 0.54725  | 4.2169   | 0.8798   |
| H    | 0.17602  | 0.66302  | 3.7218   |
| H    | 0.58293  | 1.72577  | -0.96219 |
| H    | 0.10793  | 3.32799  | -1.48221 |
| H    | 2.47439  | 4.16131  | -0.62865 |
| H    | 4.08713  | 2.99326  | -1.87663 |
| H    | 1.96847  | 0.75891  | -2.22219 |
| H    | 2.93452  | 1.37886  | -3.55095 |
| H    | 3.81861  | -0.73978 | -2.71074 |
| H    | 5.01119  | 0.53798  | -2.5499  |
| H    | 4.81474  | 0.6429   | -0.18339 |
| H    | 3.23105  | -0.08423 | -0.16691 |
| H    | 5.77015  | -1.59444 | -0.97985 |
| H    | 5.19103  | -1.54816 | 0.67514  |

**Table S17.** *Cont.*

| Atom | X        | Y        | Z        |
|------|----------|----------|----------|
| H    | 3.40488  | -2.59894 | -1.58479 |
| H    | 4.60511  | -3.61537 | -0.81258 |
| H    | 3.54806  | -3.40323 | 1.37895  |
| H    | 2.42086  | -4.01277 | 0.1629   |
| H    | -2.11162 | 1.20352  | -0.39669 |
| H    | -3.54556 | 0.64889  | 2.26337  |
| H    | -5.30527 | 1.76667  | 0.7246   |
| H    | -4.52053 | 1.01107  | -0.66044 |
| H    | -5.95246 | -0.44732 | 1.68013  |
| H    | -6.59828 | -2.09504 | 0.14043  |
| H    | -4.95387 | -0.56543 | -1.99736 |
| H    | -5.10677 | -2.31259 | -1.88671 |
| H    | -7.59185 | -2.13314 | -2.31806 |
| H    | -7.42519 | -0.37784 | -2.47898 |
| H    | -6.63246 | -1.45537 | -3.64428 |

**Table S18.** Coordinates (Ångstroms) for conformer (*M*, *R*)-C5 of neurymenolide A (Energy: -1159.526482 Hartree, Solvent: CH<sub>3</sub>OH, Boltzmann %: 44.99154159).

| Atom | X        | Y        | Z        |
|------|----------|----------|----------|
| O    | 1.71779  | -1.73853 | -1.05181 |
| C    | 2.19653  | -2.312   | 0.08295  |
| C    | 1.58327  | -2.08852 | 1.26911  |
| C    | 0.50016  | -1.1534  | 1.3309   |
| C    | 0.05404  | -0.48945 | 0.202    |
| C    | 0.62727  | -0.8582  | -1.06604 |
| O    | 0.27737  | -0.4758  | -2.17771 |
| C    | -1.02065 | 0.59654  | 0.22582  |
| C    | -0.57453 | 1.85807  | -0.50616 |
| C    | 0.33203  | 2.74989  | -0.08008 |
| O    | 0.02175  | -0.97524 | 2.57969  |
| C    | 1.11159  | 2.72512  | 1.21771  |
| C    | 2.51941  | 3.30311  | 1.15375  |
| C    | 3.49932  | 3.01011  | 0.28257  |
| C    | 3.45871  | 2.04615  | -0.87476 |
| C    | 4.55476  | 0.95762  | -0.83673 |
| C    | 4.48633  | 0.05118  | 0.40406  |
| C    | 5.25109  | -1.28175 | 0.26667  |
| C    | 4.64486  | -2.327   | -0.6921  |
| C    | 3.43114  | -3.12575 | -0.14784 |
| C    | -2.36691 | 0.04716  | -0.23499 |
| C    | -3.32528 | 0.70702  | -0.89446 |
| C    | -4.66244 | 0.1073   | -1.2717  |
| C    | -5.82235 | 0.92007  | -0.74033 |
| C    | -6.78394 | 0.52627  | 0.11024  |
| C    | -6.96997 | -0.8244  | 0.75211  |
| C    | -8.33038 | -1.45924 | 0.40914  |
| H    | 1.94886  | -2.54944 | 2.18222  |
| H    | -1.16292 | 0.87966  | 1.28303  |
| H    | -1.02563 | 2.02434  | -1.48186 |
| H    | 0.5408   | 3.60206  | -0.73012 |
| H    | -0.71405 | -0.32613 | 2.64812  |
| H    | 0.55325  | 3.30425  | 1.9677   |
| H    | 1.15587  | 1.70256  | 1.61267  |
| H    | 2.75139  | 4.0315   | 1.93297  |
| H    | 4.45289  | 3.52992  | 0.4161   |
| H    | 2.47801  | 1.56483  | -0.93486 |
| H    | 3.58109  | 2.61575  | -1.80885 |
| H    | 4.45047  | 0.35539  | -1.74838 |
| H    | 5.54782  | 1.42645  | -0.89152 |
| H    | 4.88829  | 0.59617  | 1.26778  |
| H    | 3.43773  | -0.14681 | 0.6489   |
| H    | 6.2733   | -1.06137 | -0.07223 |
| H    | 5.35651  | -1.73885 | 1.2608   |

**Table S18.** *Cont.*

| Atom | X        | Y        | Z        |
|------|----------|----------|----------|
| H    | 4.36782  | -1.86115 | -1.64522 |
| H    | 5.41631  | -3.06924 | -0.9306  |
| H    | 3.69792  | -3.61343 | 0.79633  |
| H    | 3.19081  | -3.91887 | -0.86925 |
| H    | -2.55538 | -0.98773 | 0.06308  |
| H    | -3.17457 | 1.74589  | -1.19386 |
| H    | -4.73693 | 0.08714  | -2.37137 |
| H    | -4.71028 | -0.93241 | -0.93311 |
| H    | -5.85763 | 1.9518   | -1.09973 |
| H    | -7.54463 | 1.2652   | 0.37848  |
| H    | -6.16423 | -1.51033 | 0.47059  |
| H    | -6.90804 | -0.70479 | 1.84421  |
| H    | -9.15722 | -0.79951 | 0.69742  |
| H    | -8.41524 | -1.6501  | -0.66653 |
| H    | -8.46218 | -2.41153 | 0.93476  |

**Table S19.** Coordinates (Ångstroms) for conformer (*M*, *R*)-C6 of neurymenolide A (Energy: -1159.523829 Hartree, Solvent: CH<sub>3</sub>OH, Boltzmann %: 2.708040888).

| Atom | X        | Y        | Z        |
|------|----------|----------|----------|
| O    | 1.19727  | -1.74627 | 0.09846  |
| C    | 2.09011  | -1.94353 | 1.10039  |
| C    | 2.00497  | -1.21053 | 2.23556  |
| C    | 0.9868   | -0.21292 | 2.34352  |
| C    | 0.09909  | 0.05165  | 1.31079  |
| C    | 0.20235  | -0.75305 | 0.12354  |
| O    | -0.47334 | -0.68438 | -0.89937 |
| C    | -0.9505  | 1.15719  | 1.47142  |
| C    | -0.37354 | 2.58232  | 1.38988  |
| C    | 0.27645  | 3.20122  | 0.3925   |
| O    | 1.00714  | 0.44088  | 3.52343  |
| C    | 0.65121  | 2.69218  | -0.97826 |
| C    | 2.05939  | 3.08942  | -1.37172 |
| C    | 2.9545   | 2.36584  | -2.06276 |
| C    | 2.7844   | 0.97425  | -2.61505 |
| C    | 3.93395  | 0.00712  | -2.26119 |
| C    | 4.17675  | -0.14899 | -0.74846 |
| C    | 4.88022  | -1.46619 | -0.36302 |
| C    | 3.99892  | -2.73007 | -0.4421  |
| C    | 3.10747  | -2.9987  | 0.79627  |
| C    | -2.20126 | 1.04878  | 0.61625  |
| C    | -3.42627 | 0.90277  | 1.13615  |
| C    | -4.71164 | 0.89925  | 0.34215  |
| C    | -5.58853 | -0.29305 | 0.65559  |
| C    | -6.26468 | -1.06871 | -0.20675 |
| C    | -6.32203 | -0.96484 | -1.70927 |
| C    | -6.01955 | -2.30238 | -2.40722 |
| H    | 2.70516  | -1.35767 | 3.05269  |
| H    | -1.32022 | 1.05852  | 2.50455  |
| H    | -0.58045 | 3.18288  | 2.2784   |
| H    | 0.55316  | 4.24382  | 0.57303  |
| H    | 0.24356  | 1.03469  | 3.67404  |
| H    | 0.49033  | 1.61712  | -1.06785 |
| H    | -0.04505 | 3.16068  | -1.69693 |
| H    | 2.34898  | 4.09955  | -1.07049 |
| H    | 3.92089  | 2.83346  | -2.27272 |
| H    | 1.83754  | 0.53955  | -2.2768  |
| H    | 2.71736  | 1.03703  | -3.71237 |
| H    | 3.69379  | -0.96763 | -2.70524 |
| H    | 4.86321  | 0.34097  | -2.74434 |
| H    | 4.77905  | 0.69572  | -0.39112 |
| H    | 3.22149  | -0.06791 | -0.2195  |
| H    | 5.74743  | -1.60275 | -1.02394 |
| H    | 5.28737  | -1.38113 | 0.65427  |



**Table S19.** *Cont.*

| Atom | X        | Y        | Z        |
|------|----------|----------|----------|
| H    | 3.3687   | -2.7003  | -1.33897 |
| H    | 4.64184  | -3.61175 | -0.55187 |
| H    | 3.73543  | -3.12165 | 1.6856   |
| H    | 2.57695  | -3.9486  | 0.6402   |
| H    | -2.07774 | 1.15605  | -0.45832 |
| H    | -3.5359  | 0.79268  | 2.21971  |
| H    | -5.27504 | 1.81254  | 0.60136  |
| H    | -4.49071 | 0.96763  | -0.72803 |
| H    | -5.68459 | -0.52032 | 1.72057  |
| H    | -6.86393 | -1.87983 | 0.21702  |
| H    | -7.33286 | -0.64101 | -2.00127 |
| H    | -5.63656 | -0.1934  | -2.07639 |
| H    | -5.00061 | -2.63995 | -2.18696 |
| H    | -6.71018 | -3.08584 | -2.07349 |
| H    | -6.11849 | -2.20916 | -3.49432 |

**Table S20.** Coordinates (Ångstroms) for conformer (*P*, *R*)-C1 of neurymenolide A (Energy: -1159.526518 Hartree, Solvent: CH<sub>3</sub>OH, Boltzmann %: 49.4731114).

| Atom | X        | Y        | Z        |
|------|----------|----------|----------|
| C    | 1.02138  | -1.76542 | -0.89595 |
| C    | 1.76462  | -2.21885 | 0.14292  |
| C    | 0.70058  | -0.65293 | 1.65868  |
| C    | -0.01268 | -0.07583 | 0.55324  |
| C    | 0.12395  | -0.67205 | -0.68905 |
| O    | -0.53067 | -0.28662 | -1.80296 |
| C    | -0.85141 | 1.16487  | 0.83328  |
| C    | -0.53735 | 2.32659  | -0.11624 |
| C    | 0.56906  | 3.08635  | -0.09998 |
| O    | 0.6373   | -0.31462 | 2.84049  |
| C    | 1.73786  | 2.96384  | 0.85687  |
| C    | 3.09     | 3.37064  | 0.28768  |
| C    | 3.76517  | 2.76431  | -0.70212 |
| C    | 3.32377  | 1.5743   | -1.51247 |
| C    | 4.2656   | 0.35198  | -1.44434 |
| C    | 4.38313  | -0.26284 | -0.0394  |
| C    | 4.97013  | -1.68834 | -0.00558 |
| C    | 4.13899  | -2.80726 | -0.66601 |
| C    | 2.85174  | -3.25216 | 0.07799  |
| C    | -2.35001 | 0.90904  | 0.89583  |
| C    | -2.96907 | -0.27566 | 0.83798  |
| C    | -4.46207 | -0.46857 | 0.97485  |
| C    | -5.05533 | -1.23438 | -0.18683 |
| C    | -6.10727 | -0.89365 | -0.94856 |
| C    | -6.97745 | 0.33285  | -0.84958 |
| C    | -8.45888 | -0.01499 | -0.61236 |
| H    | -0.56043 | 1.48786  | 1.8417   |
| H    | -1.30802 | 2.56947  | -0.85289 |
| H    | 0.63904  | 3.89613  | -0.82927 |
| H    | 1.53348  | 3.60594  | 1.72591  |
| H    | 1.7926   | 1.94407  | 1.25248  |
| H    | 3.55522  | 4.23994  | 0.75571  |
| H    | 4.7408   | 3.17769  | -0.97382 |
| H    | 2.31707  | 1.26515  | -1.21307 |
| H    | 3.25032  | 1.88562  | -2.56569 |
| H    | 3.87967  | -0.39478 | -2.14902 |
| H    | 5.26504  | 0.62914  | -1.80922 |
| H    | 5.01395  | 0.38412  | 0.58369  |
| H    | 3.3993   | -0.25428 | 0.44091  |
| H    | 5.95227  | -1.66936 | -0.49908 |
| H    | 5.16301  | -1.96787 | 1.03972  |
| H    | 3.87851  | -2.53671 | -1.69655 |
| H    | 4.77169  | -3.70069 | -0.73967 |
| H    | 3.0988   | -3.55641 | 1.10109  |

**Table S20.** *Cont.*

| Atom | X        | Y        | Z        |
|------|----------|----------|----------|
| H    | 2.45128  | -4.13434 | -0.43663 |
| H    | -2.94863 | 1.81337  | 1.03844  |
| H    | -2.38447 | -1.18788 | 0.70144  |
| H    | -4.64701 | -1.04781 | 1.89527  |
| H    | -4.95166 | 0.50056  | 1.11165  |
| H    | -4.55434 | -2.17966 | -0.41158 |
| H    | -6.39248 | -1.58989 | -1.74257 |
| H    | -6.6284  | 1.00274  | -0.05684 |
| H    | -6.89967 | 0.89713  | -1.79098 |
| H    | -8.84241 | -0.66789 | -1.40519 |
| H    | -8.59245 | -0.53572 | 0.34246  |
| H    | -9.07605 | 0.89016  | -0.59532 |
| H    | -1.13798 | 0.46514  | -1.66785 |
| O    | 1.5855   | -1.70073 | 1.3863   |
| H    | 1.1382   | -2.18632 | -1.89108 |

**Table S21.** Coordinates (Ångstroms) for conformer (*P*, *R*)-C2 of neurymenolide A (Energy: -1159.524501 Hartree, Solvent: CH<sub>3</sub>OH, Boltzmann %: 5.837827141).

| Atom | X        | Y        | Z        |
|------|----------|----------|----------|
| C    | 0.60183  | -2.04828 | -0.51915 |
| C    | 1.53547  | -2.3063  | 0.43099  |
| C    | 0.81251  | -0.39985 | 1.75098  |
| C    | -0.0887  | -0.03172 | 0.69844  |
| C    | -0.23418 | -0.90156 | -0.36804 |
| O    | -1.13366 | -0.71287 | -1.35682 |
| C    | -0.84134 | 1.29708  | 0.8057   |
| C    | -0.45783 | 2.2488   | -0.32302 |
| C    | 0.64714  | 3.00609  | -0.39731 |
| O    | 0.99091  | 0.1824   | 2.82075  |
| C    | 1.75822  | 3.13301  | 0.61998  |
| C    | 3.16374  | 3.26987  | 0.04784  |
| C    | 3.7637   | 2.52192  | -0.89323 |
| C    | 3.20789  | 1.34367  | -1.65089 |
| C    | 4.08569  | 0.07417  | -1.57457 |
| C    | 4.26006  | -0.46269 | -0.1441  |
| C    | 4.76057  | -1.91751 | -0.04633 |
| C    | 3.81023  | -3.02809 | -0.53827 |
| C    | 2.59368  | -3.36706 | 0.36806  |
| C    | -2.33784 | 1.04325  | 0.93391  |
| C    | -3.33879 | 1.65877  | 0.28808  |
| C    | -4.80204 | 1.35495  | 0.52013  |
| C    | -5.51345 | 0.94452  | -0.75004 |
| C    | -6.22012 | -0.17616 | -0.96798 |
| C    | -6.48575 | -1.31477 | -0.01704 |
| C    | -6.00894 | -2.66887 | -0.5733  |
| H    | -0.51998 | 1.7328   | 1.76019  |
| H    | -1.14093 | 2.29911  | -1.17173 |
| H    | 0.76695  | 3.62584  | -1.28868 |
| H    | 1.56449  | 4.03716  | 1.21601  |
| H    | 1.72524  | 2.30258  | 1.33512  |
| H    | 3.75373  | 4.07857  | 0.48324  |
| H    | 4.79247  | 2.7891   | -1.15362 |
| H    | 2.2008   | 1.10319  | -1.29652 |
| H    | 3.10637  | 1.62325  | -2.71093 |
| H    | 3.61908  | -0.68798 | -2.21142 |
| H    | 5.07311  | 0.27716  | -2.01362 |
| H    | 4.9699   | 0.18009  | 0.39228  |
| H    | 3.31446  | -0.35723 | 0.39475  |
| H    | 5.69425  | -2.00118 | -0.62071 |
| H    | 5.02992  | -2.12953 | 0.99791  |
| H    | 3.44735  | -2.80783 | -1.55    |
| H    | 4.39059  | -3.95562 | -0.62135 |
| H    | 2.93705  | -3.58021 | 1.38675  |

**Table S21.** *Cont.*

| Atom | X        | Y        | Z        |
|------|----------|----------|----------|
| H    | 2.1299   | -4.28091 | -0.02134 |
| H    | -2.59028 | 0.27104  | 1.66605  |
| H    | -3.1301  | 2.4428   | -0.44248 |
| H    | -4.90383 | 0.59558  | 1.30142  |
| H    | -5.28204 | 2.27048  | 0.90369  |
| H    | -5.42941 | 1.65952  | -1.57247 |
| H    | -6.6653  | -0.29869 | -1.95964 |
| H    | -6.01936 | -1.13401 | 0.9571   |
| H    | -7.56915 | -1.37549 | 0.16579  |
| H    | -6.48341 | -2.88889 | -1.53686 |
| H    | -4.92426 | -2.67013 | -0.72756 |
| H    | -6.25548 | -3.48408 | 0.11591  |
| H    | -1.76859 | -0.01183 | -1.1221  |
| O    | 1.59544  | -1.54336 | 1.55405  |
| H    | 0.51452  | -2.67335 | -1.40414 |

**Table S22.** Coordinates (Ångstroms) for conformer (*P*, *R*)-C3 of neurymenolide A (Energy: -1159.524676 Hartree, Solvent: CH<sub>3</sub>OH, Boltzmann %: 7.030129125).

| Atom | X        | Y        | Z        |
|------|----------|----------|----------|
| C    | 0.66117  | -2.09942 | -0.55506 |
| C    | 1.61618  | -2.34945 | 0.37587  |
| C    | 0.89247  | -0.4608  | 1.72103  |
| C    | -0.03211 | -0.09908 | 0.68715  |
| C    | -0.18698 | -0.96501 | -0.38121 |
| O    | -1.10729 | -0.77873 | -1.35164 |
| C    | -0.79129 | 1.22459  | 0.80677  |
| C    | -0.3908  | 2.19266  | -0.30187 |
| C    | 0.70606  | 2.96402  | -0.34246 |
| O    | 1.08178  | 0.11651  | 2.79153  |
| C    | 1.78722  | 3.1005   | 0.70473  |
| C    | 3.20709  | 3.25758  | 0.17528  |
| C    | 3.83733  | 2.54696  | -0.77513 |
| C    | 3.31359  | 1.39452  | -1.59359 |
| C    | 4.20936  | 0.13596  | -1.55172 |
| C    | 4.35736  | -0.46269 | -0.14261 |
| C    | 4.85283  | -1.92203 | -0.1008  |
| C    | 3.89372  | -3.00915 | -0.62755 |
| C    | 2.6918   | -3.3897  | 0.28252  |
| C    | -2.28918 | 0.96361  | 0.90241  |
| C    | -3.27883 | 1.58284  | 0.24214  |
| C    | -4.7456  | 1.26906  | 0.4363   |
| C    | -5.42572 | 0.88378  | -0.85875 |
| C    | -6.05372 | -0.26807 | -1.14448 |
| C    | -6.25615 | -1.46935 | -0.25755 |
| C    | -7.74513 | -1.78928 | -0.02833 |
| H    | -0.48811 | 1.64574  | 1.77346  |
| H    | -1.04956 | 2.23626  | -1.16978 |
| H    | 0.8421   | 3.58899  | -1.22785 |
| H    | 1.56538  | 4.00002  | 1.29824  |
| H    | 1.74512  | 2.26749  | 1.41653  |
| H    | 3.78251  | 4.05061  | 0.65677  |
| H    | 4.87154  | 2.82919  | -0.99498 |
| H    | 2.30301  | 1.12538  | -1.27153 |
| H    | 3.23009  | 1.71685  | -2.64307 |
| H    | 3.772    | -0.60455 | -2.23364 |
| H    | 5.20397  | 0.37415  | -1.95547 |
| H    | 5.05821  | 0.15415  | 0.43457  |
| H    | 3.40244  | -0.37842 | 0.38307  |
| H    | 5.78172  | -1.9883  | -0.68515 |
| H    | 5.12905  | -2.17378 | 0.93273  |
| H    | 3.51343  | -2.74058 | -1.62121 |
| H    | 4.47169  | -3.93167 | -0.76475 |
| H    | 3.04822  | -3.6187  | 1.29332  |

**Table S22.** *Cont.*

| Atom | X        | Y        | Z        |
|------|----------|----------|----------|
| H    | 2.24053  | -4.3027  | -0.12302 |
| H    | -2.55389 | 0.18282  | 1.62108  |
| H    | -3.05747 | 2.3764   | -0.47422 |
| H    | -4.86026 | 0.49267  | 1.19865  |
| H    | -5.23825 | 2.1743   | 0.82712  |
| H    | -5.38468 | 1.64626  | -1.64074 |
| H    | -6.49038 | -0.3616  | -2.14307 |
| H    | -5.78273 | -2.34044 | -0.73447 |
| H    | -5.75765 | -1.3372  | 0.70842  |
| H    | -8.24537 | -0.97261 | 0.50401  |
| H    | -8.26787 | -1.93702 | -0.98057 |
| H    | -7.86218 | -2.70344 | 0.56415  |
| H    | -1.75004 | -0.09265 | -1.09081 |
| O    | 1.68498  | -1.5941  | 1.50344  |
| H    | 0.56774  | -2.71936 | -1.44303 |

**Table S23.** Coordinates (Ångstroms) for conformer (*P*, *R*)-C4 of neurymenolide A (Energy: -1159.525184 Hartree, Solvent: CH<sub>3</sub>OH, Boltzmann %: 12.03680799).

| Atom | X        | Y        | Z        |
|------|----------|----------|----------|
| C    | 1.36031  | -2.14542 | -0.63024 |
| C    | 2.39474  | -2.19502 | 0.24649  |
| C    | 1.2767   | -0.64966 | 1.75161  |
| C    | 0.23159  | -0.4863  | 0.78397  |
| C    | 0.2568   | -1.28765 | -0.34379 |
| O    | -0.72695 | -1.28978 | -1.26879 |
| C    | -0.85605 | 0.55883  | 1.04423  |
| C    | -0.82264 | 1.67759  | 0.00622  |
| C    | 0.04038  | 2.70335  | -0.04846 |
| O    | 1.36932  | -0.10623 | 2.8519   |
| C    | 1.16384  | 3.0291   | 0.90897  |
| C    | 2.4361   | 3.57113  | 0.26795  |
| C    | 3.12796  | 3.0739   | -0.771   |
| C    | 2.82786  | 1.84613  | -1.59142 |
| C    | 4.01676  | 0.86879  | -1.72466 |
| C    | 4.51026  | 0.31548  | -0.37693 |
| C    | 5.37225  | -0.95889 | -0.46981 |
| C    | 4.67668  | -2.24937 | -0.94772 |
| C    | 3.69032  | -2.92419 | 0.04529  |
| C    | -2.21166 | -0.12242 | 1.1875   |
| C    | -3.38078 | 0.24052  | 0.63894  |
| C    | -4.687   | -0.48956 | 0.86351  |
| C    | -5.23599 | -1.08083 | -0.41712 |
| C    | -6.32776 | -0.6984  | -1.09931 |
| C    | -7.3001  | 0.40343  | -0.76711 |
| C    | -8.74468 | -0.10936 | -0.62075 |
| H    | -0.61836 | 0.98302  | 2.0283   |
| H    | -1.56235 | 1.62153  | -0.79291 |
| H    | -0.07782 | 3.40817  | -0.8745  |
| H    | 0.79927  | 3.80149  | 1.60238  |
| H    | 1.39911  | 2.16305  | 1.53871  |
| H    | 2.83118  | 4.47503  | 0.7354   |
| H    | 4.02705  | 3.61999  | -1.07244 |
| H    | 1.9698   | 1.31156  | -1.173   |
| H    | 2.53279  | 2.16204  | -2.6041  |
| H    | 3.69543  | 0.04661  | -2.3766  |
| H    | 4.8494   | 1.36397  | -2.24476 |
| H    | 5.0976   | 1.09022  | 0.13258  |
| H    | 3.6496   | 0.13505  | 0.27335  |
| H    | 6.21117  | -0.76221 | -1.1527  |
| H    | 5.82378  | -1.15276 | 0.51335  |
| H    | 4.15913  | -2.08001 | -1.90018 |
| H    | 5.4552   | -2.99415 | -1.1554  |
| H    | 4.1731   | -3.05565 | 1.02023  |



**Table S23.** *Cont.*

| Atom | X        | Y        | Z        |
|------|----------|----------|----------|
| H    | 3.4551   | -3.92259 | -0.34208 |
| H    | -2.19666 | -0.9989  | 1.84157  |
| H    | -3.44381 | 1.11497  | -0.01094 |
| H    | -4.52818 | -1.29372 | 1.59477  |
| H    | -5.41088 | 0.20667  | 1.3041   |
| H    | -4.64872 | -1.9078  | -0.82361 |
| H    | -6.56209 | -1.25159 | -2.01345 |
| H    | -7.00316 | 0.93232  | 0.145    |
| H    | -7.27536 | 1.14705  | -1.57767 |
| H    | -9.07307 | -0.6272  | -1.52957 |
| H    | -8.82958 | -0.81372 | 0.21425  |
| H    | -9.43738 | 0.71952  | -0.43799 |
| H    | -1.50808 | -0.80377 | -0.94667 |
| O    | 2.3287   | -1.51294 | 1.41973  |
| H    | 1.38295  | -2.71391 | -1.55639 |

**Table S24.** Coordinates (Ångstroms) for conformer (*P*, *R*)-C5 of neurymenolide A (Energy: -1159.525116 Hartree, Solvent: CH<sub>3</sub>OH, Boltzmann %: 11.20071241).

| Atom | X        | Y        | Z        |
|------|----------|----------|----------|
| C    | 1.43532  | -2.13128 | -0.77821 |
| C    | 2.479    | -2.18642 | 0.087    |
| C    | 1.30034  | -0.80113 | 1.69754  |
| C    | 0.24215  | -0.62163 | 0.7467   |
| C    | 0.29516  | -1.347   | -0.4303  |
| O    | -0.69415 | -1.33496 | -1.34915 |
| C    | -0.88448 | 0.36136  | 1.07446  |
| C    | -0.90706 | 1.53456  | 0.09845  |
| C    | -0.0965  | 2.60353  | 0.10302  |
| O    | 1.37423  | -0.33063 | 2.8325   |
| C    | 1.00582  | 2.92976  | 1.0844   |
| C    | 2.24195  | 3.59323  | 0.49028  |
| C    | 2.9599   | 3.22112  | -0.58263 |
| C    | 2.73454  | 2.04842  | -1.50191 |
| C    | 3.96549  | 1.12786  | -1.66164 |
| C    | 4.43367  | 0.49695  | -0.3394  |
| C    | 5.36826  | -0.71971 | -0.48924 |
| C    | 4.7641   | -2.00656 | -1.0864  |
| C    | 3.81086  | -2.82546 | -0.17174 |
| C    | -2.21112 | -0.37859 | 1.1939   |
| C    | -3.40487 | -0.01495 | 0.70197  |
| C    | -4.68293 | -0.79535 | 0.91563  |
| C    | -5.29171 | -1.27441 | -0.38432 |
| C    | -6.49491 | -0.96624 | -0.89516 |
| C    | -7.5533  | -0.06033 | -0.32146 |
| C    | -7.9512  | 1.06726  | -1.29165 |
| H    | -0.65205 | 0.74086  | 2.07787  |
| H    | -1.64384 | 1.48482  | -0.70408 |
| H    | -0.24863 | 3.34678  | -0.68275 |
| H    | 0.59465  | 3.62493  | 1.83139  |
| H    | 1.29602  | 2.03668  | 1.64999  |
| H    | 2.58625  | 4.47753  | 1.02979  |
| H    | 3.82702  | 3.83949  | -0.8342  |
| H    | 1.88355  | 1.45142  | -1.15949 |
| H    | 2.46471  | 2.43012  | -2.49872 |
| H    | 3.69959  | 0.34418  | -2.38238 |
| H    | 4.79507  | 1.69073  | -2.11333 |
| H    | 4.95618  | 1.25936  | 0.25251  |
| H    | 3.55799  | 0.22279  | 0.25577  |
| H    | 6.2186   | -0.42748 | -1.12206 |
| H    | 5.79524  | -0.96143 | 0.49425  |
| H    | 4.24965  | -1.7903  | -2.03106 |
| H    | 5.59113  | -2.68126 | -1.34102 |
| H    | 4.29725  | -3.02363 | 0.79012  |

**Table S24.** *Cont.*

| Atom | X        | Y        | Z        |
|------|----------|----------|----------|
| H    | 3.63055  | -3.79304 | -0.65467 |
| H    | -2.15156 | -1.29784 | 1.78358  |
| H    | -3.50975 | 0.90236  | 0.11989  |
| H    | -4.46967 | -1.66156 | 1.55769  |
| H    | -5.39536 | -0.16431 | 1.46087  |
| H    | -4.65846 | -1.95483 | -0.95882 |
| H    | -6.75844 | -1.42189 | -1.8541  |
| H    | -8.44835 | -0.66137 | -0.10125 |
| H    | -7.23014 | 0.37275  | 0.63108  |
| H    | -7.10093 | 1.72666  | -1.4988  |
| H    | -8.29893 | 0.65988  | -2.24822 |
| H    | -8.75953 | 1.67645  | -0.87257 |
| H    | -1.49233 | -0.90125 | -0.99632 |
| O    | 2.38817  | -1.58989 | 1.30471  |
| H    | 1.4776   | -2.63379 | -1.74116 |

**Table S25.** Coordinates (Ångstroms) for conformer (*P*, *R*)-C6 of neurymenolide A (Energy: -1159.525354 Hartree, Solvent: CH<sub>3</sub>OH, Boltzmann %: 14.42141196).

| Atom | X        | Y        | Z        |
|------|----------|----------|----------|
| C    | 1.6779   | -2.13627 | -0.85591 |
| C    | 2.60854  | -2.17598 | 0.13045  |
| C    | 1.21283  | -0.82559 | 1.58803  |
| C    | 0.27184  | -0.66544 | 0.51755  |
| C    | 0.48461  | -1.38051 | -0.6477  |
| O    | -0.38175 | -1.38622 | -1.68298 |
| C    | -0.91408 | 0.28037  | 0.7193   |
| C    | -0.8614  | 1.46614  | -0.24121 |
| C    | -0.08617 | 2.55645  | -0.1395  |
| O    | 1.13762  | -0.35864 | 2.72428  |
| C    | 0.89867  | 2.89977  | 0.95512  |
| C    | 2.17976  | 3.58285  | 0.49173  |
| C    | 3.01879  | 3.2078   | -0.4882  |
| C    | 2.91787  | 2.01132  | -1.39911 |
| C    | 4.18852  | 1.13324  | -1.43293 |
| C    | 4.55227  | 0.52801  | -0.06687 |
| C    | 5.52616  | -0.66542 | -0.11941 |
| C    | 5.01417  | -1.96775 | -0.76792 |
| C    | 3.97303  | -2.79265 | 0.03777  |
| C    | -2.22509 | -0.49502 | 0.67655  |
| C    | -3.37547 | -0.12618 | 0.09478  |
| C    | -4.65185 | -0.93652 | 0.14646  |
| -C   | -5.73355 | -0.22496 | 0.93089  |
| C    | -6.89216 | 0.27395  | 0.46983  |
| C    | -7.42879 | 0.24751  | -0.93786 |
| C    | -8.78347 | -0.47746 | -1.03949 |
| H    | -0.81252 | 0.65685  | 1.74563  |
| H    | -1.51134 | 1.40902  | -1.11521 |
| H    | -0.17508 | 3.30541  | -0.92956 |
| H    | 0.3993   | 3.58845  | 1.65263  |
| H    | 1.14118  | 2.01132  | 1.54978  |
| H    | 2.4418   | 4.48553  | 1.04678  |
| H    | 3.89496  | 3.84082  | -0.65854 |
| H    | 2.06169  | 1.38978  | -1.11916 |
| H    | 2.72262  | 2.36539  | -2.42322 |
| H    | 4.01606  | 0.33488  | -2.16575 |
| H    | 5.03731  | 1.71993  | -1.8128  |
| H    | 5.00065  | 1.30914  | 0.56039  |
| H    | 3.63435  | 0.23667  | 0.45144  |
| H    | 6.42693  | -0.35493 | -0.66802 |
| H    | 5.8601   | -0.89487 | 0.90228  |
| H    | 4.61126  | -1.7688  | -1.76875 |
| H    | 5.87595  | -2.63056 | -0.91613 |
| H    | 4.34497  | -2.97266 | 1.05277  |

**Table S25.** *Cont.*

| Atom | X        | Y        | Z        |
|------|----------|----------|----------|
| H    | 3.86763  | -3.76883 | -0.45044 |
| H    | -2.1984  | -1.44482 | 1.21809  |
| H    | -3.45002 | 0.8266   | -0.43226 |
| H    | -4.9917  | -1.14161 | -0.87562 |
| H    | -4.44226 | -1.90681 | 0.61722  |
| H    | -5.51504 | -0.10255 | 1.99443  |
| H    | -7.54858 | 0.76013  | 1.19739  |
| H    | -7.56302 | 1.28472  | -1.27968 |
| H    | -6.71255 | -0.21325 | -1.62656 |
| H    | -8.68632 | -1.53335 | -0.76341 |
| H    | -9.52445 | -0.02416 | -0.37064 |
| H    | -9.17834 | -0.428   | -2.06028 |
| H    | -1.22928 | -0.97183 | -1.43873 |
| O    | 2.35858  | -1.58528 | 1.32865  |
| H    | 1.84892  | -2.63241 | -1.80775 |
